1  
2  
3  
4  
5  
6  
7  
8  
9  
10  
11  
12  
13  
14  
15  
16  
17  
18  
19  
20  
21  
22  
23  
24  
25

# Minor isozymes tailor yeast metabolism to carbon availability

---

*Patrick H. Bradley*<sup>1,4,6</sup>, *Patrick A. Gibney*<sup>4,7</sup>, *David Botstein*<sup>1,4,5</sup>, *Olga G. Troyanskaya*<sup>2,4\*</sup>,  
*Joshua D. Rabinowitz*<sup>3,4\*</sup>.

*Departments of <sup>1</sup>Molecular Biology, <sup>2</sup>Computer Science, and <sup>3</sup>Chemistry, and the <sup>4</sup>Lewis-Sigler Institute for Integrative Genomics, Princeton University, Princeton, NJ.*

*<sup>5</sup> Present affiliation: Calico, South San Francisco, CA.*

*<sup>6</sup> Present affiliation: Gladstone Institute of Data Science and Biotechnology, San Francisco, CA.*

*<sup>7</sup> Present affiliation: Department of Food Science, Cornell University, Ithaca, NY.*

*\* To whom correspondence should be addressed.*

**Subject categories: Molecular Biology and Physiology, Ecological and Evolutionary Science**

**Running title: Minor isozymes provide flexibility in metabolism.**

# 26 Minor isozymes tailor yeast metabolism to carbon 27 availability

---

28 *Patrick H. Bradley*<sup>1,4</sup>, *Patrick A. Gibney*, *David Botstein*<sup>1,4</sup>, *Olga G. Troyanskaya*<sup>2,4\*</sup>, *Joshua*  
29 *D. Rabinowitz*<sup>3,4\*</sup>.

## 30 **Abstract**

31 Isozymes are enzymes that differ in sequence but catalyze the same chemical reactions. Despite their apparent  
32 redundancy, isozymes are often retained over evolutionary time for reasons that can be unclear. We find that, in  
33 yeast, isozymes are strongly enriched in central carbon metabolism. Using a gene expression compendium, we  
34 find that many isozyme pairs show anticorrelated expression during the respirofermentative shift, suggesting  
35 roles in adapting to changing carbon availability. Building on this observation, we assign function to two minor  
36 central carbon isozymes, aconitase 2 (*ACO2*) and pyruvate kinase 2 (*PYK2*). *ACO2* is expressed during  
37 fermentation and proves advantageous when glucose is limiting. *PYK2* is expressed during respiration and  
38 proves advantageous for growth on three-carbon substrates. *PYK2*'s deletion is rescued by expressing the major  
39 pyruvate kinase, but only if that enzyme carries mutations mirroring *PYK2*'s allosteric regulation. Thus, central  
40 carbon isozymes enable more precise tailoring of metabolism to changing nutrient availability.

## 41 **Importance**

42 Gene duplication is one of the main evolutionary drivers of new protein function. However, some gene  
43 duplicates have nevertheless persisted long-term without apparent divergence in biochemical function. Further,  
44 under standard lab conditions, many isozymes have subtle or no knockout phenotypes. These factors make it  
45 hard to assess the unique contributions of individual isozymes to fitness. We therefore developed a method to  
46 identify experimental perturbations that could expose such contributions, and applied it to yeast gene  
47 expression data, revealing a potential role for a set of yeast isozymes in adapting to changing carbon sources.  
48 Our experimental confirmation of distinct roles for two “minor” yeast isozymes, including one with no previously  
49 described knockout phenotype, highlight that even apparently redundant paralogs can have important and  
50 unique functions, with implications for genome-scale metabolic modeling and systems-level studies of  
51 quantitative genetics.

## 52 **Introduction**

53 Isozymes are distinct proteins within a single organism that can catalyze the same biochemical reactions.  
54 Although some isozymes differ in localization, substrate specificity, or cofactor preference, there are also many  
55 isozymes that are not differentiated by these criteria. The genome of budding yeast (*Saccharomyces cerevisiae*)  
56 contains many duplicate genes encoding isozymes that have persisted since the ancient duplication of the whole  
57 genome that led to the evolution of the modern *Saccharomyces* (1). Only a small fraction of these yeast gene

58 duplications remain, strongly suggesting that the remaining ones, including those that encode isozymes, must  
59 somehow have contributed to evolutionary fitness.

60 Several explanations, both complementary and also at times conflicting, have been advanced for the retention  
61 of such isozymes (and gene duplicates more generally). One is gene dosage, in which multiple gene copies  
62 contribute to maintaining adequate total enzyme levels. Papp et al. have argued that many isozyme pairs can be  
63 explained by gene dosage, since in a flux-balance model reactions catalyzed by isozymes tended to carry higher  
64 flux (2). However, a subsequent study using experimentally determined fluxes estimated that less than 20% of  
65 isozyme pairs catalyzed high flux reactions (3). Additionally, in some high-flux reactions, such as aconitase and  
66 pyruvate kinase, one “major” isozyme but not the other “minor” isozyme has been found to be essential under  
67 laboratory conditions.

68 Another potential explanation involves genetic backup, i.e., the ability of isozymes to compensate for the  
69 deletion of their partners. However, since genetic backup cannot be directly selected, it is generally agreed that  
70 this is more likely to be a side effect of isozyme retention than the cause (4). Kafri et al. demonstrated that some  
71 isozymes change in expression after deletion of their partners (“transcriptional reprogramming”), and argued  
72 that selection for robustness against nongenetic noise could give rise to both transcriptional reprogramming and  
73 genetic backup (5, 6); however, a follow-up study reported that transcriptional reprogramming was only  
74 confirmed in ~11% of tested isozyme pairs (7).

75 Isozymes are often differentially regulated, suggesting a role in fine-tuning metabolic capabilities (8). A well-  
76 understood example of such fine-tuning involves the seven hexose transporters of *S. cerevisiae* (*HXT1-7*), some  
77 of which are high-affinity/low-flux and others are low-affinity/high-flux. Collectively, these transporters allow  
78 yeast to import hexose optimally across a wide variety of environmental conditions (9). Another form of fine-  
79 tuning involves optimization for growth under specific (and less commonly-studied) environmental conditions,  
80 and it has been argued that isozymes contribute to such optimization (2, 10, 11). However, so far, existing  
81 computational and experimental tools have not proven well-suited to finding the most relevant environmental  
82 conditions for explaining the existence of isozymes. For example, flux balance analysis (FBA) models metabolism  
83 at the level of reactions, not genes, and is therefore intrinsically unable to differentiate between isozymes (2, 12,  
84 13).

85 High throughput experimental methods are, in principle, well suited to identifying the function of isozymes.  
86 Most isozymes have been knocked out in *Saccharomyces cerevisiae*, and the growth rate and competitive fitness  
87 of the resulting strains measured (3, 11, 14–16). A large number of isozyme deletions, however, have failed to  
88 show substantial fitness defects under laboratory growth conditions. For example, in a recent study that  
89 measured competitive fitness to high precision, 65% of the assayed isozyme deletions had relative fitnesses  $\geq$   
90 0.99 and some “minor” isoforms, such as the pyruvate kinase isozyme *PYK2*, even showed a slight fitness  
91 advantage (15). A limitation of these studies is that they have been conducted in only a few environmental  
92 conditions, mainly growth on rich media or defined media with amino acids, with glucose (and sometimes  
93 ethanol or glycerol) as the carbon source. The genetic tools that enable these massively parallel assays also tend  
94 to use amino acid auxotrophies as selectable markers; growth of these knockout strains therefore requires

95 nutritional supplements that can themselves contribute to growth – clearly less than ideal for studying the  
96 function of genes in central metabolism, as has indeed been recently demonstrated (17).

97 In contrast, transcriptional profiling has been conducted in a much wider array of experimental conditions. Thus,  
98 an alternative approach to identifying the function of isozymes is to mine compendia of gene expression data,  
99 with the aim of identifying conditions under which isozymes may contribute to fitness. Indeed, previous studies  
100 have noted that the differential expression of isozymes is a feature of many microarray experiments (18, 19).  
101 However, existing expression analyses (5, 19) have tended to focus on identifying transcriptional co-regulation  
102 of isozymes with other enzymes or processes. They have not focused on generating hypotheses about which  
103 environments are specifically associated with isozyme function.

104 Here we develop methods for systematically associating isozymes with specific environmental perturbations,  
105 and use these methods to identify an important role for isozymes in adapting to changing carbon source  
106 availability. This observation is intriguing given that many (though not all) metabolic isozymes date from the  
107 events that may have led *Saccharomyces* to adopt a bifurcated lifestyle, primarily fermenting when glucose is  
108 present and respiring otherwise (in what is called the “Crabtree effect”) (20–22). It suggests a rationale for the  
109 retention of isozymes over evolutionary time, providing flexibility to central metabolism and in particular,  
110 central carbon metabolism. We tested for such flexibility experimentally, by growing cells lacking specific  
111 isozymes in alternative carbon sources. In two cases we found growth defects for isozyme deletions on non-  
112 standard carbon sources, associating for the first time a specific functional role to the genes that encode them.  
113 These experimental results support for the idea that central carbon metabolic isozymes have been retained over  
114 evolutionary time to optimize the metabolism of diverse carbon sources.

## 115 **Results**

### 116 **Differentially expressed isozymes are prevalent in central carbon metabolism**

117 We began by assembling a list of co-localized metabolic isozymes (see Methods). We found that, like  
118 duplicated yeast genes in general (22), these isozymes concentrate in central carbon metabolism  
119 (Supplemental Figure S1, Fisher’s test  $p=1.04\times 10^{-9}$ ). Nearly every step in glycolysis and gluconeogenesis can be  
120 catalyzed by more than one enzyme, and storage carbohydrate metabolism and the pentose phosphate  
121 pathway also contain many isozyme pairs. In contrast, while many metabolic enzymes are involved in amino  
122 acid *de novo* biosynthesis, these pathways contain comparatively few isozymes. Indeed, in the Yeast Pathway  
123 database (23), 8% (39/485) of reactions overall are catalyzed by isozymes; however, in the pathways of  
124 glycolysis, gluconeogenesis, and fermentation, this number rises to 75% (9/12, Bonferroni-Holm-corrected  
125 Fisher’s test  $p=4.7\times 10^{-8}$ ). The pentose phosphate pathway and TCA/glyoxylate cycle are also significantly  
126 enriched for reactions catalyzed by isozymes (Bonferroni-Holm corrected Fisher’s test  $p=0.03$  and  $p=0.01$ ,  
127 respectively; see Table S1).

128 We also note that metabolic isozymes were strongly enriched for genes dating from the whole-genome  
129 duplication (WGD) of yeast (63% of isozymes date from the WGD, compared with 19% of the genome; Fisher’s  
130 test  $p < 10^{-22}$ ). Compared to non-WGD yeasts, post-WGD yeasts such as *Saccharomyces cerevisiae* are more  
131 likely to exhibit the Crabtree effect, i.e., to ferment glucose to ethanol even in the presence of oxygen. In

132 addition, post-WGD yeast are more likely to be able to survive without the mitochondrial genome (i.e., to be  
133 “petite positive”) (20). These observations raise the possibility that selective pressures related to carbon  
134 metabolism, and in particular transitions between fermentation and respiration, may have driven the  
135 retention of metabolic isozymes.

136 We wanted to determine whether isozyme pairs tend to act together as a functional unit, or whether,  
137 alternatively, each isozyme has a discrete role. If the former, then we would expect a strong tendency for  
138 isozymes to be co-expressed whereas otherwise we would expect anti-correlation or no correlation in  
139 expression otherwise. To address this question we assembled a large compendium of gene expression data  
140 consisting of more than 400 datasets (each comprising at least 6 arrays), and calculated the correlation of each  
141 isozyme gene pair’s expression within each dataset.

142 Unlike previous studies (see Note S1), we focused on statistically significant anti-correlation of gene expression  
143 within single datasets. We expect negative correlation of isozyme expression to be observed during  
144 experiments that capture the transition between environments where one vs. another isozyme is preferred.  
145 Further, when gene transcripts are measured by microarray, cross-hybridization can occur for highly  
146 homologous genes (24, 25), leading to artifactual positive correlation. Given that many isozymes in yeast have  
147 a large degree of homology, focusing on negative correlation mitigates this technical bias.

148 In our compendium, we found that overall, isozymes appeared to be anticorrelated less often than random  
149 gene pairs (Bonferroni-Holm-corrected Wilcoxon test  $p = 0.031$ ), and more often than members of the same  
150 protein complex ( $p = 9.9 \times 10^{-5}$ ) but did not differ significantly from other genes within the same metabolic  
151 pathway ( $p = 0.83$ ; Figure 1a). When the correlation of isozyme pairs over the entire expression compendium  
152 was visualized, it became clear that this intermediate level of anticorrelation could be explained by the  
153 existence of two distinct clusters of isozymes: a minority of isozyme pairs appeared to be highly correlated  
154 across most of the compendium, while a majority showed strong anticorrelation under a subset of conditions  
155 (Figure 1b). Based on how often (i.e. in how many experiments) an isozyme pair was observed to show  
156 anticorrelated expression ( $q$ -value  $\leq 0.1$ ), we used logistic regression (see Methods) to classify the pair as  
157 either more like genes from the same protein complex (consistent with a role in dosage) or more like a pair of  
158 randomly-selected genes (suggesting independent roles for the individual isozymes). We found that 19  
159 isozyme pairs resembled random pairs  $\geq 10$ x more closely than they resembled pairs drawn from the same  
160 protein complexes; at the same threshold, 13 pairs more closely resembled members of the same protein  
161 complex (Supplemental Figure S2).

162 As described in the Introduction, one explanation for isozyme retention is gene dosage: that is, having multiple  
163 copies of an enzyme may enable increased total enzyme expression (26). If isozymes were retained strictly for  
164 the purpose of increased dosage, we would not expect them to be differentially expressed. The prominence of  
165 anti-correlated pairs therefore demonstrates that dosage alone does not explain the continued retention of  
166 the majority of retained isozyme pairs, contrary to some previous assertions (2) but in accord with Ihmels et al.  
167 (27). Additionally, there was little overlap between co-expressed isozymes and those isozymes catalyzing high-  
168 flux reactions, as defined in a previous study (3), further arguing against a predominant role for dosage: only  
169 the GAPDH (*TDH1-3*) and hexokinase (*HXK1/GLK1*) enzymes appeared in both lists. Indeed, it appears that a

170 majority of isozyme pairs are strongly anticorrelated in a condition-dependent manner, suggesting a role for  
171 these pairs in adaptation to different environments.

## 172 **A set of 21 isozyme pairs shows strong differential expression with changing carbon** 173 **availability**

174 Visualizing the anti-correlation of isozyme pairs also revealed that many were differentially expressed in the  
175 same datasets. This suggested that specific experimental conditions may be particularly relevant to explaining  
176 isozyme retention. We therefore wanted to identify the specific experimental perturbations leading to  
177 isozyme expression anticorrelation. Building on related work (5, 19, 27) (see SI Discussion), we first simply  
178 sorted the transcriptional datasets (each containing several individual arrays; for example, a heat shock time  
179 course would be one “dataset” (28)) by the number of isozyme pairs in each that were anticorrelated. Datasets  
180 with the most differential expression of isozyme pairs included many experiments related to the carbon source  
181 (Table S2). An alternative analysis by partitioning around medoids (PAM) clustering of the differential  
182 expression matrix revealed similar results (Supplemental Figure S3).

183 To test the association between carbon source perturbations and differential isozyme regulation more  
184 systematically, we performed dimensionality reduction of the datasets by grouping them into clusters of  
185 experiments in which the same genes showed the strongest expression changes. To accomplish this, we took the  
186 variance of each gene within each dataset and then clustered these variance vectors using a consensus  $k$ -means  
187 clustering, with the number of clusters determined by AIC (29) (see Methods). This method was effective at  
188 grouping together datasets reflecting similar experimental perturbations. For example, one cluster of datasets  
189 included diauxic shift time courses (30–32), carbon starvation time courses (33), a panel of mutants with and  
190 without glucose (34), and a 15-day wine fermentation (35). We then used this clustering to ask two questions:  
191 first, whether isozyme pairs were anticorrelated in a particular cluster, and second, whether they were more  
192 strongly anticorrelated within that cluster than in other datasets (see Figure 2a and Methods).

193 Indeed, we found that a core set of 13 isozyme pairs tended to be particularly strongly anticorrelated in a cluster  
194 of conditions having to do with diauxic shift/glucose limitation, and a partially-overlapping set of 14 pairs was  
195 strongly anticorrelated in a cluster of datasets containing several glucose pulse/upshift experiments; these pairs  
196 number 21 in total (Figure 2b). We also found that, for instance, 6 isozyme pairs were specifically associated  
197 with meiosis and sporulation, and 9 pairs with aerobic vs. anaerobic growth. These findings highlight the ability  
198 of this method, when applied to a large expression compendium, to associate sub-groups of anticorrelated  
199 isozymes not only with stress in general, but also to more specific environmental stressors.

200 Examining the original expression data from diauxic shift and glucose removal experiments revealed a clear  
201 visual pattern of anticorrelation (Figure 3a), which was conserved across different yeast strains (Supplemental  
202 Figure S4) (36) and even across species as shown using data from the most diverged *Saccharomyces sensu stricto*  
203 yeast, *Saccharomyces bayanus* (now called *Saccharomyces uvarum*) (Figure 3b) (37). Taken together, these  
204 results suggest that a core set of central carbon metabolic isozymes may be involved in adaptation to non-  
205 fermentable carbon sources.



206 We next sought to assign function to “minor” metabolic enzymes, using the aconitase isozyme *ACO2* as an  
207 example of an isozyme that is selectively expressed when glucose is available, and the pyruvate kinase isozyme  
208 *PYK2* of an example of the converse, an isozyme selectively expressed in the absence of glucose. Additionally,  
209 both *ACO2* and *PYK2* have isozyme paralogs (*ACO1* and *CDC19*) with profound deletion phenotypes, but have  
210 subtle (*ACO2*) or no (*PYK2*) recorded deletion phenotypes themselves.

## 211 **Aconitase 2 is required for efficient glycolytic respiration**

212 Aconitases are iron-sulfur proteins that catalyze the second step of the TCA cycle, taking citrate to its isomer,  
213 isocitrate, via aconitate. This reaction does not require redox or nucleotide cofactors, nor is it at a branch point  
214 in metabolism; however, it is required for  $\alpha$ -ketoglutarate synthesis and TCA cycle turning.

215 Yeast has two aconitase isozymes, *ACO1* and *ACO2*, both of which are mitochondrial; deletions of *ACO1* and  
216 *ACO2* are synthetically lethal (13). From the above analysis of microarray data, we noticed that *ACO1* is  
217 repressed by glucose and expressed on glucose removal, while *ACO2* has the opposite transcriptional pattern.  
218 *ACO1* is the “major” isozyme, and its deletion has been shown to be severely defective on respiratory carbon  
219 sources, such as glycerol, ethanol, and lactate (38). Its expression in the absence of glucose is consistent with the  
220 activation of TCA turning. Given that yeast prefer to ferment in the presence of glucose, the function of the  
221 *ACO2* isozyme was unclear, although a high-throughput competitive fitness screen had reported that an *aco2Δ*  
222 strain had a growth defect in minimal medium with glucose (14).

223 We began our experimental studies with an *aco2Δ* mutant strain by studying its growth in glucose minimal  
224 medium. We observed no growth defect during exponential phase in glucose minimal medium, indicating that  
225 residual expression of *ACO1* is sufficient to support synthesis of  $\alpha$ -ketoglutarate and associated amino acid  
226 products (e.g., glutamate, glutamine, lysine). Growth of the *aco2Δ* deletion strain, however, saturated earlier  
227 than wild-type in glucose minimal medium (Figure 4b, inset). This suggests that *ACO2* plays an increasingly  
228 important role as glucose becomes limiting.

229 On limiting glucose, wild-type *S. cerevisiae* continues to perform glycolysis but, instead of fermenting the  
230 resulting pyruvate to ethanol, activates respiration to make more ATP. We refer to this state as “glycolytic  
231 respiration,” as distinguished from “gluconeogenic respiration,” in which cells respire using 2- and 3-carbon  
232 substrates like ethanol, glycerol, or acetate (Figure 4a). We hypothesized that the function of the *ACO2* isozyme  
233 is to support glycolytic respiration. To test this hypothesis, we grew the *aco2Δ* strain on minimal medium with  
234 trehalose as the carbon source. Trehalose, a glucose-glucose disaccharide, is cleaved extracellularly by *S.*  
235 *cerevisiae*; this produces glucose at a slow rate (39), inducing sustained glycolytic respiration. On trehalose, the  
236 *aco2Δ* deletion had a fitness disadvantage of 25% (Figure 4b), confirming that this aconitase isozyme supports  
237 glycolytic respiration. Furthermore, we observed no defect of the *aco2Δ* deletion when grown on minimal media  
238 with gluconeogenic carbon sources (Supplemental Figure S5), indicating that the metabolic role of *aco2Δ* is  
239 specific to glycolytic and not gluconeogenic respiration.

240 We also profiled the metabolome of *aco2Δ* and compared it with wild-type, using chemostat culture to maintain  
241 steady state growth on limiting glucose. Consistent with lowered aconitase activity, aconitate levels were  
242 somewhat elevated and  $\alpha$ -ketoglutarate depleted (Figure 4c). We also observed increases in the levels of  
243 compounds in the *de novo* NAD<sup>+</sup> biosynthesis pathway from tryptophan, such as kynurenic acid (Supplemental

244 Figure S6). This connection to NAD<sup>+</sup> biosynthesis aligns with previous observations that a deletion of *bna1* (a key  
245 NAD<sup>+</sup> biosynthetic gene) is synthetically sick with *aco2Δ* (40). Further work is required to identify the molecular  
246 mechanism underlying this phenotype.

## 247 **Pyruvate kinase 2 is required for efficient growth on three-carbon substrates**

248 We next studied growth of the pyruvate kinase isozyme encoded by the *PYK2* gene, an example of an isozyme  
249 that is selectively expressed in the absence of glucose. Pyruvate kinase catalyzes the last step of glycolysis,  
250 taking phosphoenolpyruvate (PEP) to pyruvate and producing ATP from ADP. This step of glycolysis is highly  
251 regulated from yeast (41) to humans (42). The “major” yeast isozyme is known as *CDC19* (where “CDC” is from  
252 “cell division cycle”: a *cdc19* deletion causes arrest at the G1/S transition). It is expressed in the presence of  
253 glucose and its activity requires high cytosolic fructose-1,6-bisphosphate levels, which are produced when  
254 glucose is abundant. The *PYK2* isozyme lacks such regulation by fructose-1,6-bisphosphate. Deletion of *CDC19*  
255 is lethal on glucose, but deletion of *PYK2* has no known phenotype on either glucose or ethanol (43). Because  
256 it does not require activation by FBP, it has been suggested that *PYK2* may contribute to fitness specifically  
257 when glucose is limiting (44); however, we found that the *pyk2Δ* deletion exhibits no growth defect on  
258 trehalose, contradicting this hypothesis (Figure 5a). While ethanol-fed cells must also make pyruvate, they  
259 appear to do so primarily from the TCA cycle via malic enzyme (*MAE1*) (43), rendering pyruvate kinase  
260 unimportant.

261 *S. cerevisiae* grows better on a mixture of glycerol and ethanol than ethanol alone. While this glycerol could  
262 potentially be used to make pyruvate via PEP, the *pyk2Δ* deletion displayed no growth phenotype on  
263 glycerol/ethanol (Figure 5a). This raised the possibility that in cells fed glycerol-ethanol, like cells fed ethanol  
264 alone, pyruvate is made via *MAE1*. We confirmed this via experiments with <sup>13</sup>C-glycerol and LC-MS: upon feeding  
265 uniformly <sup>13</sup>C-labeled glycerol and unlabeled ethanol, while glucose-6-phosphate labeled from glycerol as  
266 expected, alanine (which is made by transamination of pyruvate) remained primarily unlabeled (Figure 6b).  
267 Conversely, feeding the cells [1-<sup>13</sup>C]-ethanol led to labeling in both malate and alanine. This indicates a lack of  
268 reliance on pyruvate kinase in glycerol-ethanol fed cells. Indeed, the *pyk2Δ* deletion showed no difference from  
269 wild-type in labeling patterns (Figure 5b).

270 In light of the above results, we hypothesized that *PYK2* would be required on carbon sources that (i) result in  
271 insufficient fructose-1,6-bisphosphate levels to activate *CDC19* and (ii) require pyruvate kinase activity to make  
272 pyruvate. We further reasoned that 3-carbon substrates would meet the above requirements. While glycerol is a  
273 common 3-carbon substrate, *Saccharomyces cerevisiae* cannot grow on glycerol minimal medium without amino  
274 acids, presumably because of inability to maintain cytosolic redox balance (glycerol is more reduced than  
275 glucose) (45). We therefore searched for another 3-carbon substrate that could sustain growth as the sole  
276 carbon source. *S. cerevisiae* has two dihydroxyacetone kinases, *DAK1* and *DAK2*, that enable slow but sustained  
277 growth on the triose dihydroxyacetone (DHA) (46). DHA enters metabolism through glycolysis/gluconeogenesis,  
278 as opposed to through the TCA cycle, so during growth on DHA, pyruvate should be made using pyruvate kinase  
279 as opposed to malic enzyme. Since *CDC19* is turned off in the absence of glucose (both transcriptionally and  
280 allosterically), the majority of the flux through pyruvate kinase should be catalyzed by *PYK2* (Figure 5c).



281 Indeed, we observed that deletion of *pyk2* inhibited growth on DHA (Figure 5d). Further, during continuous  
282 culture on dihydroxyacetone, while phosphoenolpyruvate (PEP) levels remained close to wild-type, the *pyk2Δ*  
283 deletion was depleted in pyruvate kinase's products: pyruvate and ATP. The downstream pyruvate product,  
284 acetyl-CoA, was also depleted. This pattern of metabolite levels is consistent with impaired pyruvate kinase  
285 activity in this mutant (Figure 5e; see also Supplemental Figure S6).

286 Further, while lab yeast do not grow on a strict minimal medium with glycerol, amino acid supplementation can  
287 restore growth. For example, the "complete supplement mixture" (CSM), containing selected amino acids and  
288 nucleobases, is sufficient to permit growth on glycerol (45). In *Saccharomyces cerevisiae*, amino acid  
289 degradation does not always yield carbon skeletons that can enter central carbon metabolism; instead, the  
290 carbon skeletons of many amino acids are either used only in amino acid biosynthesis, or are discarded in the  
291 form of fusel alcohols via the Ehrlich pathway, which has been speculated to play an important role in  
292 maintaining redox balance (47). The only amino acids in CSM known to be catabolized to central carbon  
293 intermediates are L-aspartate and L-arginine. To allow growth on glycerol without the confounding influence of  
294 other potential carbon sources, we therefore constructed a synthetic glycerol medium supplemented with a  
295 version of CSM lacking these amino acids (CSM-Arg-Asp).

296 When grown on glycerol with CSM-Arg-Asp, we observe that the *pyk2Δ* deletion strain is severely impaired  
297 relative to wild-type (Figure 5f). In contrast, previous studies have found no defect of *pyk2Δ* during growth on  
298 synthetic complete media containing all amino acids. Together, these results indicate a previously unappreciated  
299 role for the pyruvate kinase isozyme *PYK2* in allowing metabolism of three-carbon substrates.

300 Finally, we wanted to definitively test our hypothesis about the mechanism by which *PYK2* permits growth on  
301 three-carbon substrates: that is, that *PYK2* enables growth on glycerol and dihydroxyacetone because unlike  
302 *CDC19*, it does not require allosteric activation by FBP, which is depleted in the absence of glucose. Since *CDC19*  
303 is repressed under non-fermentative conditions, however, it could also be possible that either pyruvate kinase  
304 allows growth on 3-carbon conditions and that the relevant difference between *PYK2* and *CDC19* is regulation at  
305 the promoter level.

306 To distinguish between these two possibilities, we performed two rescue experiments in which, using the *delitto*  
307 *perpetto* method (48), we kept the promoter of *PYK2* completely intact, but replaced the *PYK2* coding sequence  
308 with either the wild-type *CDC19* or the E392A point-mutant of *CDC19*, which allows *CDC19* activity regardless of  
309 FBP concentrations (49, 50). Rescue with wild-type *CDC19* did not improve growth on glycerol with CSM-Arg-  
310 Asp; rescue with the E392A allele, in sharp contrast, restored growth completely (Figure 6f). Similar results, with  
311 a partial rescue by the wild-type *CDC19* allele and a complete rescue by the E392A allele, were also observed for  
312 dihydroxyacetone (Supplemental Figure S7). These results support our hypothesis that the *PYK2* gene has been  
313 retained in *Saccharomyces cerevisiae* because of an "escape from adaptive conflict" (51–53): the presence of  
314 *PYK2* allows the cell to control *CDC19* activity through allosteric activation, which has previously been shown to  
315 be important for adapting to short-term glucose removal (54), while also resolving the incompatibility between  
316 this regulation and growth on three-carbon substrates.

## 317 Discussion

318 Through computational analysis of a large compendium of expression data, we found that a set of co-localized  
319 metabolic isozymes is differentially expressed in response to glucose availability, and that this differential  
320 expression is conserved over evolutionary time. We then experimentally found condition-specific contributions  
321 to fitness for two of these isozymes, *ACO2* and *PYK2*. In the case of *ACO2*, the deletion shows only a subtle  
322 defect on glucose but a defect of 25% on trehalose (i.e. limiting glucose). In the case of *PYK2*, the deletion  
323 shows no defect on glucose, ethanol, or glycerol-ethanol, but a defect of 42% on dihydroxyacetone, and near-  
324 complete growth inhibition when glycerol was the sole carbon source. Also, another study confirmed that the  
325 acetyl-CoA synthase isozymes *ACS1* and *ACS2*, identified as part of the same cluster of differentially-expressed  
326 isozymes returned using our method, display opposite phenotypes on fermentable and non-fermentable  
327 carbon sources (55), further supporting the validity of this approach.

328 The conclusion that even so-called “minor” isozymes make important contributions to fitness that cannot be  
329 easily buffered is in line with other recent genome-scale analyses. One recent study first predicted fitness costs  
330 for gene deletions using a flux balance model, then calculated the evolutionary rates of these genes using  
331 sequence analysis, and finally asked whether genes with larger predicted deletion phenotypes evolved more  
332 slowly. The authors demonstrated this expected relationship only appeared when isozymes were assumed to be  
333 non-redundant, as opposed to individually dispensable (56). Furthermore, a study analyzing experimentally  
334 determined deletion phenotypes concluded that even closely-related, non-essential duplicates actually made  
335 distinct, condition-specific contributions to fitness, with effect sizes that are likely large enough for purifying  
336 selection to have retained them both (57). Finally, another study integrating experimental data with several  
337 bioinformatic estimates of functional divergence concluded that hardly any paralogous pairs are truly  
338 functionally redundant (58). Together, these lines of inquiry reinforce the conclusion that failure to find fitness  
339 differences in standard media does not indicate dispensability: the differences in fitness that led to retention of  
340 a gene may often be detected only under very specific growth conditions. As in the examples we provided here,  
341 careful analysis of the relevant biochemical pathways may often be required to infer the appropriate  
342 environments in which the differences in fitness can be made manifest.

343 Overall, out of 77 isozyme pairs in yeast, our bioinformatic analyses suggest that 24 are differentiated primarily  
344 by compartment, 21 by gene expression on carbon sources, and 16 by gene expression in other conditions. This  
345 leaves 16 whose expression is strongly positively correlated, suggesting a potential primary role for gene dosage  
346 effects. However, few of these 16 pairs catalyze high-flux reactions according to Kuepfer et al. (3), suggesting  
347 that even in these cases, dosage may not be the primary explanation. Furthermore, some metabolic isozymes  
348 that do not show gene expression differences in our analysis have been reported to be differentially regulated at  
349 the level of protein concentration. For example, *ENO1* and *ENO2*, the cytosolic enolases, display opposite  
350 changes in abundance due to glucose availability when assayed by chromatography followed by activity assay  
351 (59). This is consistent with the observation that deletion of *eno2*, but not *eno1*, causes abnormal cell cycle  
352 progression during standard growth (60). However, *ENO1* and *ENO2* are highly correlated across our expression  
353 compendium. This may be either because their mRNAs are hard to distinguish by microarray, or because their  
354 primary regulation is at the level of translation, post-translational modification, or protein stability. Greater  
355 availability of RNA sequencing and quantitative proteomics data will therefore be valuable for this type of  
356 analysis in the future.

357 For isozymes that are differentiated by condition-specific expression, dosage may still have played an important  
358 role in their initial evolutionary selection. For example, Conant and Wolfe argue that loss of duplicates outside of  
359 glycolysis may have led to higher flux through glycolysis and thus a competitive fitness advantage shortly  
360 following the whole genome duplication in yeast (26). In this model, further specialization of isozymes occurred  
361 shortly following the whole-genome duplication. Such further specialization likely provided an evolutionary  
362 benefit through escape from adaptive conflict: gene duplication allows the expression level and/or enzymatic  
363 activity of a protein to be tailored to two different conditions, where a single protein would have to “split the  
364 difference” and would thus be imperfectly adapted to both (52).

365 What kinds of adaptive conflict might drive isozyme differentiation? One conflict is between affinity and speed  
366 ( $K_m$  vs.  $k_{cat}$ ), as exemplified by the hexose transporters. Another kind of conflict arises from differing allosteric  
367 regulatory requirements, as exemplified by the pyruvate kinases. Allosteric regulation of pyruvate kinase by  
368 fructose-1,6-bisphosphate (FBP) is conserved from bacteria (61) to human (62). Recently, it has been recognized  
369 that ultrasensitive (i.e., cooperative) activation by FBP enables pyruvate kinase activity to turn “on” and “off” in  
370 a switch-like manner in response to glucose availability (54). In bacteria, similar allosteric activation has also  
371 been observed for not only pyruvate kinase but also the other main PEP-consuming enzyme, PEP carboxykinase  
372 (50). Such switch-like regulation facilitates growth in oscillating glucose environments and prevents futile cycling  
373 in gluconeogenic ones. It is problematic, however, for substrates that enter metabolism via lower glycolysis.  
374 They must rely on simultaneous “downward” flux through pyruvate kinase, on the one hand, and “upward” flux  
375 through fructose-bisphosphate aldolase to produce 6-carbon sugars, on the other. “Downward” flux requires  
376 high FBP to activate pyruvate kinase, while “upward” flux requires low FBP to render net FBP formation by  
377 aldolase thermodynamically favorable. Here, we show that the solution involves expression of *PYK2*, whose  
378 activity does not depend on high FBP levels.

379 It is notable that even though the differential allosteric regulation of *CDC19* and *PYK2* has been known for 20  
380 years, and despite extensive interest in pyruvate kinase isozymes due to the strong association of the  
381 mammalian pyruvate kinase M2 isozyme with cancer (63), no functional role for *PYK2* had been previously  
382 identified. Indeed, a recent competitive fitness study assaying more than 400 growth conditions revealed a  
383 growth phenotype on at least one condition for 97% of yeast genes, but did not find any fitness defect for the  
384 *pyk2Δ* deletion (16).

385 Another study (64) expressed both *CDC19* and *PYK2* from non-native promoters to tune pyruvate kinase  
386 function experimentally, concluding that lower pyruvate kinase activity was accompanied by an increase in  
387 oxidative metabolism and oxidative stress resistance. This is in line with previous reports that slower growth  
388 rates, as the authors show occurs with pyruvate kinase downregulation, induce both respiration and stress-  
389 protective machinery in yeast (18, 65) which includes intracellular glutathione, an important antioxidant (66).  
390 However, this work does not give a specific functional role for *PYK2*, and does not provide experimental  
391 evidence explaining the retention of *PYK2* in wild-type yeast. Here, we demonstrate that the Pyk2p protein  
392 product specifically, and not Cdc19p, is important for efficient growth on three-carbon substrates.

393 Despite decades of research on yeast physiology, dihydroxyacetone was only identified as a sole carbon source  
394 for *S. cerevisiae* in 2003 (46). Further, even though glycerol is a commonly-used non-fermentable carbon source  
395 in yeast biology, it has almost always been used in rich or extensively supplemented media, which contain other

396 potential carbon sources (45). A full understanding of the role of yeast isozymes in central metabolism will likely  
397 go hand-in-hand with a more complete understanding of potential modes of carbon metabolism. More  
398 generally, many functions of yeast metabolic genes and enzymes may only become manifest when growth and  
399 viability in a wider variety of environments are studied. Because prolonged propagation on glucose may have led  
400 to the loss of certain metabolic capabilities (e.g., xylose catabolism) in lab yeast strains (67), study of natural  
401 isolates may also be important.

402 An important dichotomy in our findings is between the conditions that control isozyme expression, and those in  
403 which isozymes are functionally important. A similar duality between the genes induced under a particular  
404 condition and the genes necessary for growth in that condition has been previously observed (68–70). Here, we  
405 find that the expression of a large subset of isozymes is controlled by glucose availability, and indeed  
406 experimentally confirm that two “minor” isozymes play important roles when glucose is low or absent. Yet this  
407 broad characterization in terms of gene expression belies much more complex and specific functional roles for  
408 these isozymes. For example, *ACO2* is expressed most in the presence of glucose, yet *ACO2* is functionally  
409 important only when glucose is scarce: this indicates that its expression in high glucose actually reflects  
410 preparation for future times when glucose is limiting. Similarly, the absence of glucose induces expression of  
411 *PYK2*, yet *PYK2* is useful only in the case of carbon sources that feed into lower glycolysis, bypassing the  
412 metabolite (and key allosteric regulator) fructose-1,6-bisphosphate. Thus, a set of isozymes render yeast central  
413 carbon metabolism more flexible, allowing a small number of fundamental transcriptional states to produce  
414 optimal enzyme activities across a broad range of potential environmental conditions.

415

## 416 **Methods**

### 417 **Identifying metabolic isozymes of the same compartment**

418 Our criteria for identifying isozymes relevant to our study were as follows: (i) The proteins had to perform the  
419 same reaction: we drew our initial list of protein pairs meeting these criteria from the reconstructed metabolic  
420 model of *Saccharomyces cerevisiae* iLL672 (3); (ii) The proteins needed to have the same small molecules as  
421 products and reactants, as detailed in the Yeast Pathway Database (23); we therefore excluded, for example,  
422 the protein mannosyl-O-transferases *PMT1-6*, since these enzymes have different proteins as substrates; (iii)  
423 We included only isozymes annotated as preferring the same co-factors (e.g.  $\text{NADP}^+$  vs.  $\text{NAD}^+$ ) in the  
424 *Saccharomyces* Genome Database (71); (iv) We only considered isozymes whose products and reactants were  
425 in the same subcellular compartment (i.e., excluding transporters); (v) We excluded isozymes that were  
426 annotated to different compartments (e.g. mitochondria vs. cytosol) (72) (24 pairs). Our final list was  
427 comprised of 53 isozyme pairs and 85 genes in total, some having more than one partner (e.g., the three  
428 glyceraldehyde-3-phosphate dehydrogenases *TDH1*, *TDH2*, and *TDH3*).

429 To test whether pathways were enriched for isozymes, pathways were drawn from the Yeast Pathway  
430 database (23) and then combined into the categories shown in Supplemental Figure S1. (When testing “central  
431 carbon metabolism,” we included all reactions from “glycolysis, gluconeogenesis, fermentation”, “pentose

432 phosphate pathway”, and “TCA cycle.”) The proportion of reactions catalyzed by isozymes in each category  
433 was calculated, and the two-tailed Fisher’s exact test was used to establish significance (Table 1).

## 434 **Assessing anticorrelation of metabolic isozymes**

### 435 **Processing of gene expression data**

436 Microarray data from the Gene Expression Omnibus (GEO) (73) and SPELL (28) were downloaded, processed,  
437 and divided into single-experiment datasets as in Note S2 (Supplemental Methods). We then constructed an  $m \times$   
438  $n$  binary matrix of anticorrelation  $B$  such that each entry  $b_{m,n}$  was 1 if gene pair  $m$  was anticorrelated at a  
439 significance threshold of  $q < 0.1$  in dataset  $n$ . The matrix  $B$  was sorted by columns from most to least  
440 anticorrelation ( $\sum_m b_{m,n}$ ); the top 10 datasets with the most anticorrelated pairs are listed in Supplemental Table  
441 S2. To determine whether isozyme pairs separated naturally into multiple groups,  $B$  was also clustered using  
442 partitioning around medoids (PAM) with  $k = 3$  clusters, yielding two coherent clusters (Note S2).

### 443 **Comparison of isozymes with other types of proteins**

444 We compared differential expression of isozymes with other pairs of genes. Lists of genes in protein complexes  
445 came from a high-throughput pulldown/mass-spectrometry assay; only “core” complexes (i.e., sets of proteins  
446 that co-purified most often) were used (74). We then computed the proportion of arrays in which a given gene  
447 pair was differentially expressed,  $p_m = (\sum_n b_{m,n})/(n)$ . Here, as above,  $b_{m,n} = 1$  if the correlation  $r_{x,y,d}$  was  
448 significantly less than 0 at a  $q$ -value of 0.1 (75), and was set to 0 otherwise; row  $m$  corresponds to gene pair  $(x, y)$   
449 and column  $n$  corresponds to dataset  $d$ . The distributions of  $p_m$  values were compared via the nonparametric  
450 two-tailed Kolmogorov-Smirnov test.

### 451 **Testing differential expression within dataset clusters**

452 To cluster datasets, per-gene standard deviations were computed for every dataset. Missing values in the  
453 resulting  $m \times n$  matrix, with  $m$  as the number of genes and  $n$  as the number of datasets, were imputed using  
454 KNNimpute with 10 neighbors (76), discarding first genes and then datasets with more than 70% missing  
455 values. Standard deviations were logged after adding a constant equal to half the smallest standard deviation  
456 in a given dataset. Next, the matrix was first column-normalized (i.e. mean-subtracted and divided by standard  
457 deviation) and then row-normalized, to ensure that genes or datasets with larger dynamic ranges did not  
458 dominate the clustering. This is a related approach to that described by Tavazoie et al. (77).

459 To ensure robustness of the clustering, a consensus  $k$ -means clustering (29) was then performed for  $k$  ranging  
460 from 2 to 50. Briefly, in this consensus clustering, 125 subsamples of the original matrix were generated,  
461 sampling 80% of the rows and 80% of the columns. These subsamples were clustered via  $k$ -means, and the  
462 resulting clusterings were converted into a “consensus matrix” giving the proportion of subsamples in which  
463 two datasets clustered together; this consensus matrix was then hierarchically clustered and cut to give  $k$   
464 groups. For each value of  $k$ , AIC was calculated (i.e.,  $RSS(k) + 2Mk$ , where  $RSS$  is the residual sum of squares  
465 with  $k$  clusters and  $M$  is the length of each vector) (78). AIC was then minimized, yielding  $k = 16$  clusters.

466 To test for specificity of differential expression within dataset clusters, for each isozyme pair  $(i_1, i_2)$  and cluster  
467 of datasets  $C$ , we stipulated two criteria. First, we required that the average normalized correlation of the pair  
468  $(i_1, i_2)$  tended to be negative in datasets  $d$  within the cluster  $C$ , i.e.,

$$469 \quad \frac{1}{|C|} \sum_{d \in C} \operatorname{atanh}(r_{i_1, i_2, d}) (\sqrt{N_d - 3}) < 0$$



470 (Here,  $r_{i_1, i_2}$  is the Pearson correlation of isozymes  $i_1$  and  $i_2$ , and  $N_d$  is the number of observations in dataset  $d$ .  
471  $\operatorname{atanh}$  is the hyperbolic arctangent function, used for the Fisher z-transform as described in 4.2.1.) Second, we  
472 tested whether the normalized correlation of the pair ( $z_{i_1, i_2, d} = \operatorname{atanh}(r_{i_1, i_2, d}) (\sqrt{N_d - 3})$ ) tended to be less  
473 within the cluster than without (i.e.,  $z_{i_1, i_2, (d \in C)} < z_{i_1, i_2, (d \notin C)}$ ), using a one-tailed rank sum test.  $p$  values for this  
474 test were corrected according to the  $q$ -value method of Storey (75), and a cutoff of  $q \leq 0.1$  was applied.

## 475 **Strain construction, media and growth conditions**

### 476 **Strains**

477 Prototrophic *aco2* and *pyk2* deletion strains were provided by David Hess and Amy Caudy from their  
478 prototrophic deletion collection (79) The final prototrophic deletion strains had the genotype MAT $\alpha$ ,  
479 *yfg* $\Delta$ ::*KanMX*, *can1* $\Delta$ ::*STE3pr-SpHIS5*, *his3* $\Delta$ 0, *lyp1* $\Delta$ , where *yfg* represents either *aco2* or *pyk2*.  
480 For the rescue experiments, wild-type *CDC19* or *cdc19*-E392A were introduced into the native *PYK2* promoter  
481 using the *delitto perfetto* allele-replacement method (48). Starting with DBY12000, a *HAP1+* derivative of FY4,  
482 *PYK2* was knocked out using the *pCORE* construct, which contains an antibiotic resistance cassette (*KanMX*) and  
483 a counterselectable marker (*URA3*): selection for resistance to geneticin yielded a *pyk2* $\Delta$ ::*CORE* strain. *URA3* was  
484 then knocked out to allow for use of the counterselectable marker. *CDC19* (wt or E392A) was then amplified  
485 using primers with overhangs homologous to this construct. The resulting PCR products were then transformed  
486 into the *pyk2* $\Delta$ ::*CORE* knockout and transformants were selected based on loss of the counterselectable marker  
487 (i.e., resistance to 5-FOA), yielding *pyk2* $\Delta$ ::*CDC19* and *pyk2* $\Delta$ ::*cdc19*-E392A strains in a *ura3* $\Delta$  background. Finally,  
488 these strains were mated to a strain with wild-type *URA3*; sporulation and dissection yielded fully prototrophic  
489 strain with genotypes MAT $\alpha$ , *pyk2* $\Delta$ ::*CDC19*(wt/E392A).

### 490 **Media recipes**

491 Minimal media for batch cultures were prepared using 6.7g/L Yeast Nitrogen Base (Difco) and an appropriate  
492 carbon source. Final concentrations of carbon sources were 20g/L for glucose (YNB-glucose), 100g/L for  
493 trehalose as per Jules et al. (39) (YNB-trehalose), 20g/L each for glycerol/ethanol (YNB-glycerol/ethanol), and 9  
494 g/L (100 mM) for dihydroxyacetone as per Boles et al., 1998 (YNB-DHA). Minimal media for chemostats were  
495 prepared according to the glucose-limited chemostat media (CM-glucose) recipe in Dunham et al. (80); for DHA-  
496 limited chemostats (CM-DHA), 8 mM DHA was substituted for 8 mM glucose. Synthetic glycerol medium  
497 (glycerol/CSM-Arg-Asp) was prepared using YNB without ammonium and 3% glycerol, plus the following  
498 nitrogen bases and L-amino acids: 10 mg/L adenine, 20 mg/L His, 50 mg/L Ile, 100 mg/L Leu, 50 mg/L Lys, 20  
499 mg/L Met, 50 mg/L Phe, 100 mg/L Thr, 50 mg/L Trp, 50 mg/L Tyr, 20 mg/L uracil, and 140 mg/L Val.

### 500 **Batch cultures**

501 Wild-type (*ho* $\Delta$ ) and isozyme deletions (*aco2* $\Delta$ , *pyk2* $\Delta$ ) were struck out on YPD. For growth curves, a different  
502 colony was picked for each biological replication and placed into YNB-glucose and grown overnight. Overnight  
503 cultures were then set back in YNB-glucose for at least one doubling. For growth curves on glucose, the cultures  
504 were then set back such that the optical density at 600nm (OD600) was close to 0.1. For growth curves on YNB-  
505 trehalose and YNB-dihydroxyacetone, log-phase cultures grown in glucose were set back into media containing  
506 either trehalose or dihydroxyacetone and allowed to double at least twice in the new medium; cultures were  
507 then set back to an OD600 of 0.1 to start the growth curve. For the experiment measuring final density on  
508 glycerol/CSM-Arg-Asp, cultures were inoculated into SD, then washed 3x in YNB without ammonium, and set  
509 back to an initial OD600 of 0.05 in glycerol/CSM-Arg-Asp; final OD600 was measured after 16 days.

### 510 **Chemostat cultures**



511 Wild-type and isozyme deletions were struck out onto a YPD plate and then inoculated in CM-glucose (for  
512 glucose-limited chemostats) or a minimal medium with YNB, dihydroxyacetone, and 0.05% glucose (CM-DHA-  
513 glucose, for DHA-limited chemostats). For CM-DHA-glucose, overnights were allowed to grow an additional day.  
514 Overnights were then used to inoculate one chemostat per strain/medium combination, with media limited for  
515 either glucose or for dihydroxyacetone (see media recipes). Batch mode proceeded for one day for glucose-  
516 limited chemostats and three days for DHA-limited chemostats. The working volume of each chemostat was 300  
517 mL. After batch mode, pumps were turned on such that the dilution rate was approximately 0.018/hr. Mean and  
518 median cell volume and cell number were assayed using the Coulter counter. Each chemostat was sampled 4x  
519 each for metabolites after Coulter counter readings and media pH stabilized.

## 520 **Metabolite sampling and normalization**

### 521 **Metabolite pool size sampling from chemostats**

522 Metabolites were sampled according to the procedure described in Crutchfield et al. (81). 5 mL of chemostat  
523 culture was filtered and metabolism was immediately quenched using 1.5 mL of -20°C 40:40:20 ACN:MeOH:H<sub>2</sub>O.  
524 Samples were then concentrated by drying with nitrogen gas and subsequent resuspension in 100% HPLC water.  
525 These samples were then analyzed via reversed phase ion-pairing liquid chromatography coupled to a Thermo  
526 Fisher Scientific Exactive instrument with high mass accuracy, allowing untargeted analysis (82, 83). Samples  
527 were collected in quadruplicate. Media filtrate samples were analyzed using two triple-quadrupole mass  
528 spectrometers, one running in positive mode (Finnigan TWQ Quantum Ultra) that was coupled to HILIC  
529 chromatography (84) and one in negative mode (TSQ Quantum Discovery Max) that was coupled to reversed-  
530 phase ion-pairing liquid chromatography (85) as previously described (66).

531  
532 Data were normalized by total cell volume as per Boer et al., 2010 (66) and then log-transformed. In Figures 4  
533 and 5, each sample from a deletion strain was compared to the corresponding wild-type sample run  
534 immediately preceding. In Supplemental Figure S6, the data were similarly normalized for run order (which was  
535 not confounded with either strain background or nutrient limitation): briefly, a linear model  $Y = aX + b + \epsilon$  was fit  
536 to each metabolite vector  $Y$ , using run order as the regressor  $X$ . The residuals  $\epsilon$  were then kept and visualized as  
537 a heat map, after subtracting out the average levels of metabolites in wild-type under glucose-limitation.

### 538 **Metabolite labeling experiments**

539 Metabolites were labeled by transferring cultures into media with either U-<sup>13</sup>C glycerol and U-<sup>12</sup>C ethanol, or 2-  
540 <sup>13</sup>C EtOH and U-<sup>12</sup>C glycerol. Labeled substrates were provided by Cambridge Isotopes. After 8 hours of growth  
541 in the labeled medium, metabolism was quenched, and extracts were then concentrated 3x and analyzed with  
542 LC/MS as above. Three biological replicates were sampled per strain and condition. Isotope labeling patterns  
543 were corrected for natural abundance and impurity of the tracer (~1% <sup>12</sup>C) using least-squares.

## 544 **Data Availability**

545 Source code used to perform the analyses is available from <http://www.bitbucket.com/pbradz/isozymes>.  
546 Steady-state metabolite ion counts are provided in Supplemental Datasets S1 and S2.

## 547 **Acknowledgements**

548 The authors would like to thank Amy Caudy for providing strains and expertise, David Hess for providing strains,  
549 Jing Fan for code to correct isotopomer distributions, and Yifan Xu for helpful discussions and for providing the

550 *cdc19*-E392A strain. This research was made possible by funding from the NIH (R01 GM-071966 to OGT), NSF  
551 (MCB-0643859 and CBET-0941143 to JDR), AFOSR (FA9550-09-1-0580 to JDR) and the DOE (DE-SC0002077).

## 552 **Author contributions**

553 PHB, DB, OGT, and JDR designed the research plan; PHB performed the computational analysis, *aco2Δ* and  
554 *pyk2Δ* growth curves, and metabolite labeling and quantification experiments; PHB and PAG performed  
555 chemostat cultures; PAG constructed the *pyk2Δ* rescue strains and assayed their growth; and PHB and JDR wrote  
556 the manuscript. All authors read and commented on the manuscript.

## 557 **Conflict of interest**

558 The authors declare no conflicts of interest.

559

## 560 **References**

- 561 1. Wolfe KH, Shields DC (1997) Molecular evidence for an ancient duplication of the entire yeast genome.  
562 *Nature* 387(6634):708–713.
- 563 2. Papp B, Pál C, Hurst LD (2004) Metabolic network analysis of the causes and evolution of enzyme  
564 dispensability in yeast. *Nature* 429(6992):661–664.
- 565 3. Kuepfer L, Sauer U, Blank LM (2005) Metabolic functions of duplicate genes in *Saccharomyces cerevisiae*.  
566 *Genome Res* 15(10):1421–1430.
- 567 4. Nowak MA, Boerlijst MC, Cooke J, Smith JM (1997) Evolution of genetic redundancy. *Nature*  
568 388(6638):167–71.
- 569 5. Kafri R, Bar-Even A, Pilpel Y (2005) Transcription control reprogramming in genetic backup circuits. *Nat*  
570 *Genet* 37(3):295–9.
- 571 6. Kafri R, Levy M, Pilpel Y (2006) The regulatory utilization of genetic redundancy through responsive  
572 backup circuits. *Proc Natl Acad Sci U S A* 103(31):11653–8.
- 573 7. DeLuna A, Springer M, Kirschner MW, Kishony R (2010) Need-based up-regulation of protein levels in  
574 response to deletion of their duplicate genes. *PLoS Biol* 8(3):e1000347.
- 575 8. Ihmels J, Bergmann S, Barkai N (2004) Defining transcription modules using large-scale gene expression  
576 data. *Bioinformatics* 20(13):1993–2003.
- 577 9. Boles E, Hollenberg CP (1997) The molecular genetics of hexose transport in yeasts. *FEMS Microbiol Rev*  
578 21(1):85–111.
- 579 10. Ihmels J, Collins SR, Schuldiner M, Krogan NJ, Weissman JS (2007) Backup without redundancy: genetic  
580 interactions reveal the cost of duplicate gene loss. *Mol Syst Biol* 3:86.
- 581 11. DeLuna A, et al. (2008) Exposing the fitness contribution of duplicated genes. *Nat Genet* 40(5):676–681.
- 582 12. Segrè D, Deluna A, Church GM, Kishony R (2005) Modular epistasis in yeast metabolism. *Nat Genet*  
583 37(1):77–83.

- 584 13. Deutscher D, Meilijson I, Kupiec M, Ruppin E (2006) Multiple knockout analysis of genetic robustness in  
585 the yeast metabolic network. *Nat Genet* 38(9):993–8.
- 586 14. Giaever G, et al. (2002) Functional profiling of the *Saccharomyces cerevisiae* genome. *Nature*  
587 418(6896):387–391.
- 588 15. Breslow DK, et al. (2008) A comprehensive strategy enabling high-resolution functional analysis of the  
589 yeast genome. *Nat Methods* 5(8):711–718.
- 590 16. Hillenmeyer ME, et al. (2008) The chemical genomic portrait of yeast: uncovering a phenotype for all  
591 genes. *Science* (80- ) 320(5874):362–365.
- 592 17. Alam MT, et al. (2016) The metabolic background is a global player in *Saccharomyces* gene expression  
593 epistasis. *Nat Microbiol* 1(3):15030.
- 594 18. Gasch AP, et al. (2000) Genomic expression programs in the response of yeast cells to environmental  
595 changes. *Mol Biol Cell* 11(12):4241–57.
- 596 19. Ihmels J, Levy R, Barkai N (2004) Principles of transcriptional control in the metabolic network of  
597 *Saccharomyces cerevisiae*. *Nat Biotechnol* 22(1):86–92.
- 598 20. Merico A, Sulo P, Piskur J, Compagno C (2007) Fermentative lifestyle in yeasts belonging to the  
599 *Saccharomyces* complex. *FEBS J* 274(4):976–989.
- 600 21. Piškur J (2001) Origin of the duplicated regions in the yeast genomes. *Trends Genet* 17(6):302–303.
- 601 22. Seoighe C, Wolfe KH (1999) Yeast genome evolution in the post-genome era. *Curr Opin Microbiol*  
602 2(5):548–554.
- 603 23. Caspi R, et al. (2008) The MetaCyc Database of metabolic pathways and enzymes and the BioCyc  
604 collection of Pathway/Genome Databases. *Nucleic Acids Res* 36(Database issue):D623–D631.
- 605 24. Xing Y, et al. (2008) MADS: a new and improved method for analysis of differential alternative splicing by  
606 exon-tiling microarrays. *RNA* 14(8):1470–9.
- 607 25. Kapur K, Jiang H, Xing Y, Wong WH (2008) Cross-hybridization modeling on Affymetrix exon arrays.  
608 *Bioinformatics* 24(24):2887–93.
- 609 26. Conant GC, Wolfe KH (2007) Increased glycolytic flux as an outcome of whole-genome duplication in  
610 yeast. *Mol Syst Biol* 3:129.
- 611 27. Bergmann S, Ihmels J, Barkai N (2003) Iterative signature algorithm for the analysis of large-scale gene  
612 expression data. *Phys Rev E* 67(3):31902.
- 613 28. Hibbs MA, et al. (2007) Exploring the functional landscape of gene expression: directed search of large  
614 microarray compendia. *Bioinformatics* 23(20):2692–2699.
- 615 29. Wilkerson MD, Hayes DN (2010) ConsensusClusterPlus: a class discovery tool with confidence  
616 assessments and item tracking. *Bioinformatics* 26(12):1572–1573.
- 617 30. Brauer MJ, Saldanha AJ, Dolinski K, Botstein D (2005) Homeostatic adjustment and metabolic remodeling  
618 in glucose-limited yeast cultures. *Mol Biol Cell* 16(5):2503.
- 619 31. DeRisi JL, Iyer VR, Brown PO (1997) Exploring the metabolic and genetic control of gene expression on a  
620 genomic scale. *Science* (80- ) 278(5338):680–686.
- 621 32. Segal E, Koller D, Yelensky R (2003) Genome-wide discovery of transcriptional modules from DNA  
622 sequence and gene expression. *Bioinformatics* 19 Suppl 1:i273–i282.

- 623 33. Bradley PH, Brauer MJ, Rabinowitz JD, Troyanskaya OG (2009) Coordinated concentration changes of  
624 transcripts and metabolites in *Saccharomyces cerevisiae*. *PLoS Comput Biol* 5(1):e1000270.
- 625 34. Azzouz N, et al. (2009) Specific roles for the Ccr4-Not complex subunits in expression of the genome. *RNA*  
626 15(3):377–383.
- 627 35. Marks VD, et al. (2008) Dynamics of the yeast transcriptome during wine fermentation reveals a novel  
628 fermentation stress response. *FEMS Yeast Res* 8(1):35–52.
- 629 36. Carreto L, et al. (2011) Expression variability of co-regulated genes differentiates *Saccharomyces*  
630 *cerevisiae* strains. *BMC Genomics* 12:201.
- 631 37. Caudy AA, et al. (2013) A new system for comparative functional genomics of *Saccharomyces* yeasts.  
632 *Genetics* 195(1):275–87.
- 633 38. Steinmetz LM, et al. (2002) Systematic screen for human disease genes in yeast. *Nat Genet* 31(4):400–4.
- 634 39. Jules M, Guillou V, François J, Parrou J-L (2004) Two distinct pathways for trehalose assimilation in the  
635 yeast *Saccharomyces cerevisiae*. *Appl Env Microbiol* 70(5):2771–2778.
- 636 40. Szappanos B, et al. (2011) An integrated approach to characterize genetic interaction networks in yeast  
637 metabolism. *Nat Genet* 43(7):656–62.
- 638 41. Pearce AK, et al. (2001) Pyruvate kinase (Pyk1) levels influence both the rate and direction of carbon flux  
639 in yeast under fermentative conditions. *Microbiology* 147(Pt 2):391–401.
- 640 42. Yamada K, Noguchi T (1999) Regulation of pyruvate kinase M gene expression. *Biochem Biophys Res*  
641 *Commun* 256(2):257–262.
- 642 43. Boles E, de Jong-Gubbels P, Pronk JT (1998) Identification and characterization of MAE1, the  
643 *Saccharomyces cerevisiae* structural gene encoding mitochondrial malic enzyme. *J Bacteriol*  
644 180(11):2875–2882.
- 645 44. Boles E, et al. (1997) Characterization of a glucose-repressed pyruvate kinase (Pyk2p) in *Saccharomyces*  
646 *cerevisiae* that is catalytically insensitive to fructose-1,6-bisphosphate. *J Bacteriol* 179(9):2987–93.
- 647 45. Swinnen S, et al. (2013) Re-evaluation of glycerol utilization in *Saccharomyces cerevisiae*: characterization  
648 of an isolate that grows on glycerol without supporting supplements. *Biotechnol Biofuels* 6(1):157.
- 649 46. Molin M, Norbeck J, Blomberg A (2003) Dihydroxyacetone kinases in *Saccharomyces cerevisiae* are  
650 involved in detoxification of dihydroxyacetone. *J Biol Chem* 278(3):1415–1423.
- 651 47. Hazelwood LA, Daran J-M, van Maris AJA, Pronk JT, Dickinson JR (2008) The Ehrlich pathway for fusel  
652 alcohol production: a century of research on *Saccharomyces cerevisiae* metabolism. *Appl Environ*  
653 *Microbiol* 74(8):2259–66.
- 654 48. Stuckey S, Storici F (2013) Gene knockouts, in vivo site-directed mutagenesis and other modifications  
655 using the delitto perfetto system in *Saccharomyces cerevisiae*. *Methods Enzymol* 533:103–31.
- 656 49. Fenton AW, Blair JB (2002) Kinetic and allosteric consequences of mutations in the subunit and domain  
657 interfaces and the allosteric site of yeast pyruvate kinase. *Arch Biochem Biophys* 397(1):28–39.
- 658 50. Xu Y-F, Amador-Noguez D, Reaves ML, Feng X-J, Rabinowitz JD (2012) Ultrasensitive regulation of  
659 anapleurosis via allosteric activation of PEP carboxylase. *Nat Chem Biol* 8(6):562–568.
- 660 51. Hittinger CT, Carroll SB (2007) Gene duplication and the adaptive evolution of a classic genetic switch.  
661 *Nature* 449(7163):677–681.
- 662 52. Conant GC, Wolfe KH (2008) Turning a hobby into a job: how duplicated genes find new functions. *Nat*

- 663 *Rev Genet* 9(12):938–950.
- 664 53. Des Marais DL, Rausher MD (2008) Escape from adaptive conflict after duplication in an anthocyanin  
665 pathway gene. *Nature* 454(7205):762–5.
- 666 54. Xu Y-F, et al. (2012) Regulation of Yeast Pyruvate Kinase by Ultrasensitive Allostery Independent of  
667 Phosphorylation. *Mol Cell* 48(1):52–62.
- 668 55. Chen Y, Siewers V, Nielsen J (2012) Profiling of cytosolic and peroxisomal acetyl-CoA metabolism in  
669 *Saccharomyces cerevisiae*. *PLoS One* 7(8):e42475.
- 670 56. Jacobs C, Lambourne L, Xia Y, Segrè D (2017) Upon Accounting for the Impact of Isoenzyme Loss, Gene  
671 Deletion Costs Anticorrelate with Their Evolutionary Rates. *PLoS One* 12(1):e0170164.
- 672 57. Plata G, Vitkup D (2014) Genetic robustness and functional evolution of gene duplicates. *Nucleic Acids*  
673 *Res* 42(4):2405–14.
- 674 58. Soria PS, McGary KL, Rokas A (2014) Functional Divergence for Every Paralog. *Mol Biol Evol* 31(4):984–  
675 992.
- 676 59. McAlister L, Holland MJ (1982) Targeted deletion of a yeast enolase structural gene. Identification and  
677 isolation of yeast enolase isozymes. *J Biol Chem* 257(12):7181–8.
- 678 60. Niu W, Li Z, Zhan W, Iyer VR, Marcotte EM (2008) Mechanisms of cell cycle control revealed by a  
679 systematic and quantitative overexpression screen in *S. cerevisiae*. *PLoS Genet* 4(7):e1000120.
- 680 61. Waygood EB, Mort JS, Sanwal BD (1976) The control of pyruvate kinase of *Escherichia coli*. Binding of  
681 substrate and allosteric effectors to the enzyme activated by fructose 1,6-bisphosphate. *Biochemistry*  
682 15(2):277–82.
- 683 62. Mattevi A, Bolognesi M, Valentini G (1996) The allosteric regulation of pyruvate kinase. *FEBS Lett*  
684 389(1):15–9.
- 685 63. Chaneton B, Gottlieb E (2012) Rocking cell metabolism: revised functions of the key glycolytic regulator  
686 PKM2 in cancer. *Trends Biochem Sci* 37(8):309–16.
- 687 64. Grüning N-M, et al. (2011) Pyruvate kinase triggers a metabolic feedback loop that controls redox  
688 metabolism in respiring cells. *Cell Metab* 14(3):415–27.
- 689 65. Brauer MJ, et al. (2008) Coordination of growth rate, cell cycle, stress response, and metabolic activity in  
690 yeast. *Mol Biol Cell* 19(1):352–367.
- 691 66. Boer VM, Crutchfield CA, Bradley PH, Botstein D, Rabinowitz JD (2010) Growth-limiting intracellular  
692 metabolites in yeast growing under diverse nutrient limitations. *Mol Biol Cell* 21(1):198–211.
- 693 67. Wenger JW, Schwartz K, Sherlock G (2010) Bulk segregant analysis by high-throughput sequencing  
694 reveals a novel xylose utilization gene from *Saccharomyces cerevisiae*. *PLoS Genet* 6(5):e1000942.
- 695 68. Tai SL, et al. (2007) Correlation between transcript profiles and fitness of deletion mutants in anaerobic  
696 chemostat cultures of *Saccharomyces cerevisiae*. *Microbiology* 153(Pt 3):877–86.
- 697 69. Klosinska MM, Crutchfield CA, Bradley PH, Rabinowitz JD, Broach JR (2011) Yeast cells can access distinct  
698 quiescent states. *Genes Dev* 25(4):336–49.
- 699 70. Gibney PA, Lu C, Caudy AA, Hess DC, Botstein D (2013) Yeast metabolic and signaling genes are required  
700 for heat-shock survival and have little overlap with the heat-induced genes. *Proc Natl Acad Sci U S A*  
701 110(46):E4393–402.
- 702 71. Cherry JM, et al. (1998) SGD: *Saccharomyces Genome Database*. *Nucleic Acids Res* 26(1):73–9.

- 703 72. Huh W-K, et al. (2003) Global analysis of protein localization in budding yeast. *Nature* 425(6959):686–  
704 691.
- 705 73. Edgar R, Domrachev M, Lash AE (2002) Gene Expression Omnibus: NCBI gene expression and  
706 hybridization array data repository. *Nucleic Acids Res* 30(1):207–210.
- 707 74. Gavin A-C, et al. (2006) Proteome survey reveals modularity of the yeast cell machinery. *Nature*  
708 440(7084):631–636.
- 709 75. Storey JD, Tibshirani R (2003) Statistical significance for genomewide studies. *Proc Natl Acad Sci U S A*  
710 100(16):9440–9445.
- 711 76. Troyanskaya O, et al. (2001) Missing value estimation methods for DNA microarrays. *Bioinformatics*  
712 17(6):520–5.
- 713 77. Tavazoie S, Hughes JD, Campbell MJ, Cho RJ, Church GM (1999) Systematic determination of genetic  
714 network architecture. *Nat Genet* 22(3):281–285.
- 715 78. Manning CD, Raghavan P, Schütze H (2008) *Introduction to Information Retrieval* (Cambridge University  
716 Press).
- 717 79. VanderSluis B, et al. (2014) Broad metabolic sensitivity profiling of a prototrophic yeast deletion  
718 collection. *Genome Biol* 15(4):R64.
- 719 80. Dunham MJ, Mitchell E Dunham Lab Chemostat Manual. Available at:  
720 <http://dunham.gs.washington.edu/chemostatv2.htm>.
- 721 81. Crutchfield CA, Lu W, Melamud E, Rabinowitz JD (2010) Mass spectrometry-based metabolomics of yeast.  
722 *Methods Enzymol* 470:393–426.
- 723 82. Lu W, et al. (2010) Metabolomic analysis via reversed-phase ion-pairing liquid chromatography coupled  
724 to a stand alone orbitrap mass spectrometer. *Anal Chem* 82(8):3212–3221.
- 725 83. Clasquin MF, et al. (2011) Riboneogenesis in yeast. *Cell* 145(6):969–980.
- 726 84. Bajad SU, et al. (2006) Separation and quantitation of water soluble cellular metabolites by hydrophilic  
727 interaction chromatography-tandem mass spectrometry. *J Chromatogr A* 1125(1):76–88.
- 728 85. Lu W, Bennett BD, Rabinowitz JD (2008) Analytical strategies for LC-MS-based targeted metabolomics. *J*  
729 *Chromatogr B Anal Technol Biomed Life Sci* 871(2):236–242.
- 730 86. Guan Y, Dunham M, Caudy A, Troyanskaya O (2010) Systematic planning of genome-scale experiments in  
731 poorly studied species. *PLoS Comput Biol* 6(3):e1000698.

732

733

734



735 **Figures**

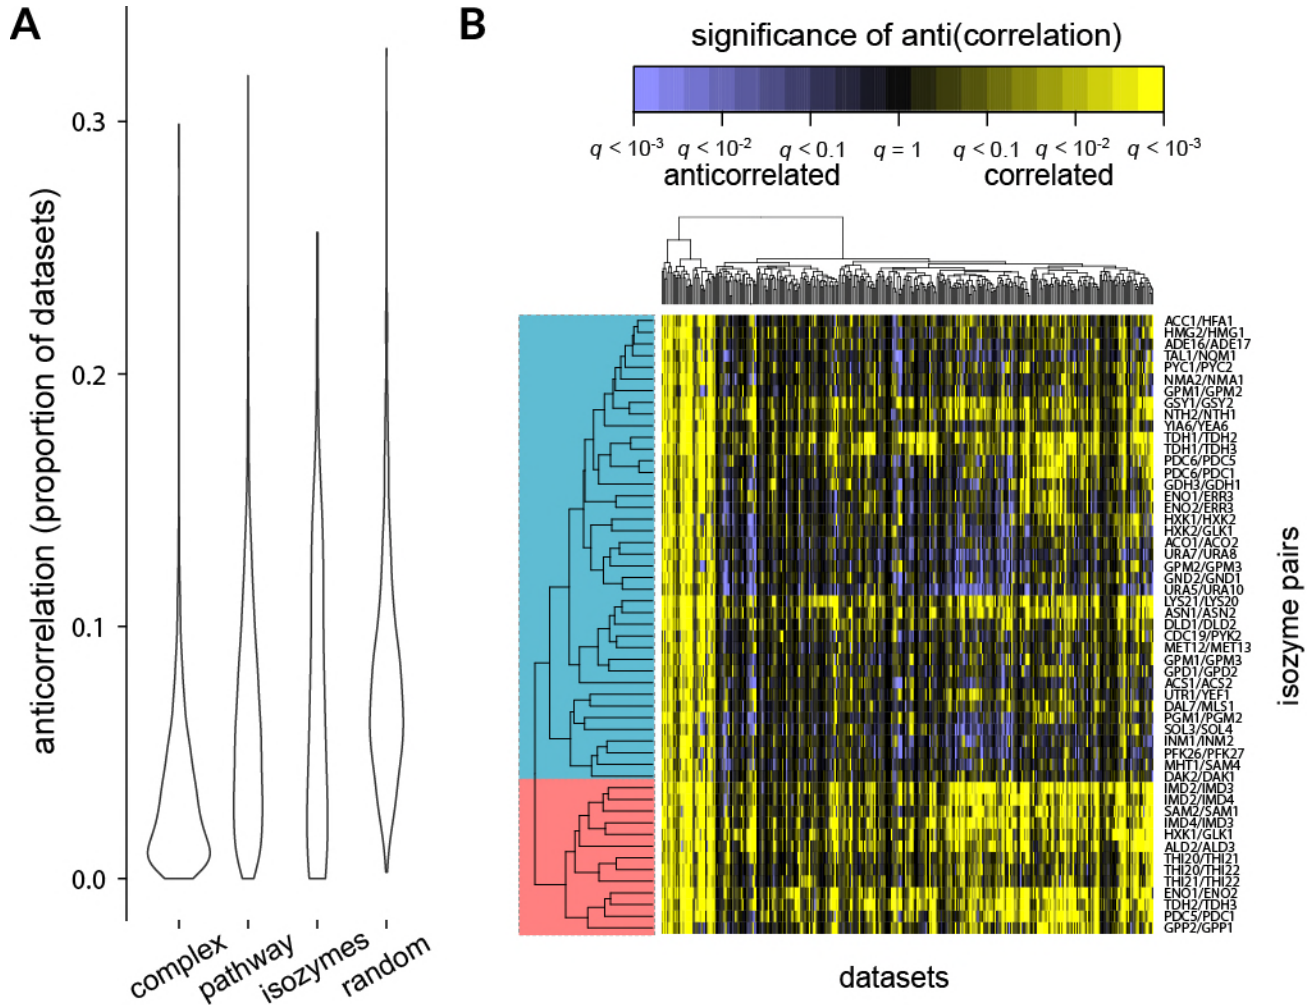

736

737 Figure 1. Many isozyme pairs are differentially expressed. a) Box plots of anticorrelation among isozyme pairs,  
 738 compared with i) members of the same protein complex, ii) members of the same metabolic pathway, and iii)  
 739 random gene pairs. Isozyme pairs are more likely to show differential expression than genes in the same  
 740 complex (Bonferroni-Holm-corrected 2-sided Wilcox test  $p$ -value  $9.9 \times 10^{-5}$ ), but less likely than random genes  
 741 (Holm-corrected  $p = 0.031$ ). b) Isozyme pairs separate into two broad categories, depending on how often they  
 742 are anticorrelated. The matrix displayed shows the correlation (yellow) or anticorrelation (blue) of isozyme pairs  
 743 (rows) over every dataset (columns) in the compendium. Intensity corresponds to significance of the  
 744 (anti)correlation ( $q$ -value). Hierarchical clustering using uncentered Pearson's correlation reveals two main  
 745 clusters of isozyme pairs: a minority are strongly correlated over most of the compendium, while a majority  
 746 show condition-dependent anticorrelation.

## A 1. Cluster related datasets

| Diauxic shift, carbon sources | Sporulation   | BY/RM segregants    |
|-------------------------------|---------------|---------------------|
| Diauxic shift 1               | Meiosis 1     | Segregants (glu) 1  |
| Carbon starvation             | Meiosis 2     | Segregants (glu) 2  |
| Diauxic shift 2               | Sporulation 1 | Segregants (EtOH) 1 |
| Extended wine fermentation    | Sporulation 2 | ...                 |
| ...                           | ...           | ...                 |

## 2. Test if isozyme anticorrelation is specific to a cluster

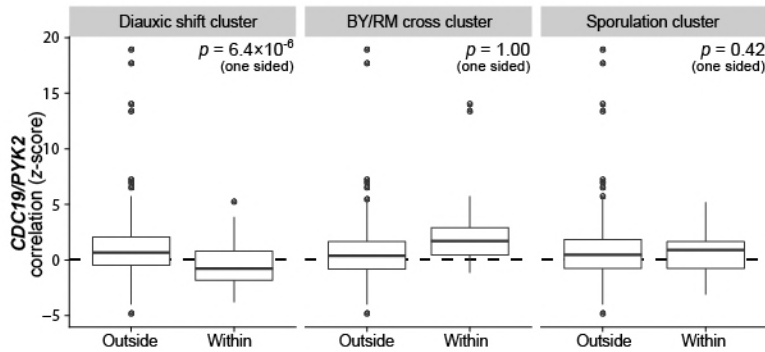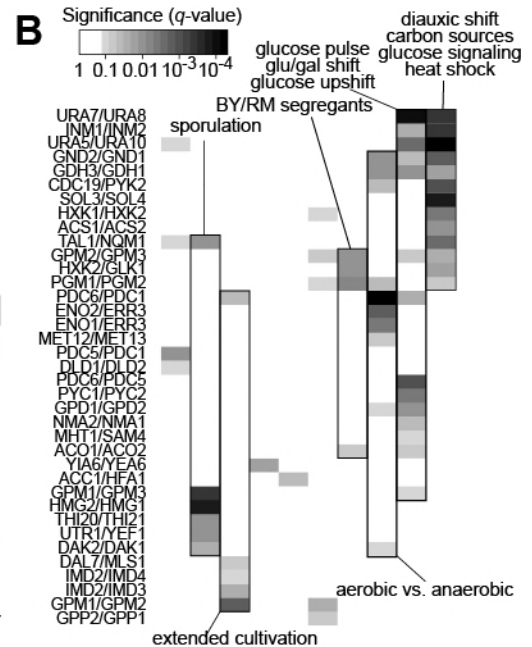

747 Figure 2. Sixteen isozyme pairs are associated with the metabolism of alternative carbon sources. a) Outline of  
 748 method for association of isozyme pairs with particular dataset clusters. First, datasets are grouped into clusters  
 749 of related experimental conditions (see Methods). Three of the resulting clusters are shown, with representative  
 750 datasets. Next, for each dataset cluster and each isozyme pair, we test whether that pair is anticorrelated within  
 751 that cluster, and if so, whether it is significantly more anticorrelated within that cluster vs. in other datasets. We  
 752 show as an example *CDC19/PYK2*, which passes these criteria only within the first cluster of datasets (related to  
 753 diauxic shift). This suggests the pair *CDC19/PYK2* is associated with the respirofermentative transition. b) A set of  
 754 16 isozyme pairs is specifically differentially expressed in a cluster of datasets having to do with metabolism of  
 755 alternative carbon sources. Separately, 5 other pairs appear to be associated with sporulation and meiosis. A  
 756 filled cell indicates that significant anticorrelation of a given isozyme pair was observed within a given dataset  
 757 cluster, with the intensity of the cell corresponding to the  $q$ -value (the false discovery rate analog of a  $p$ -value).

758

759

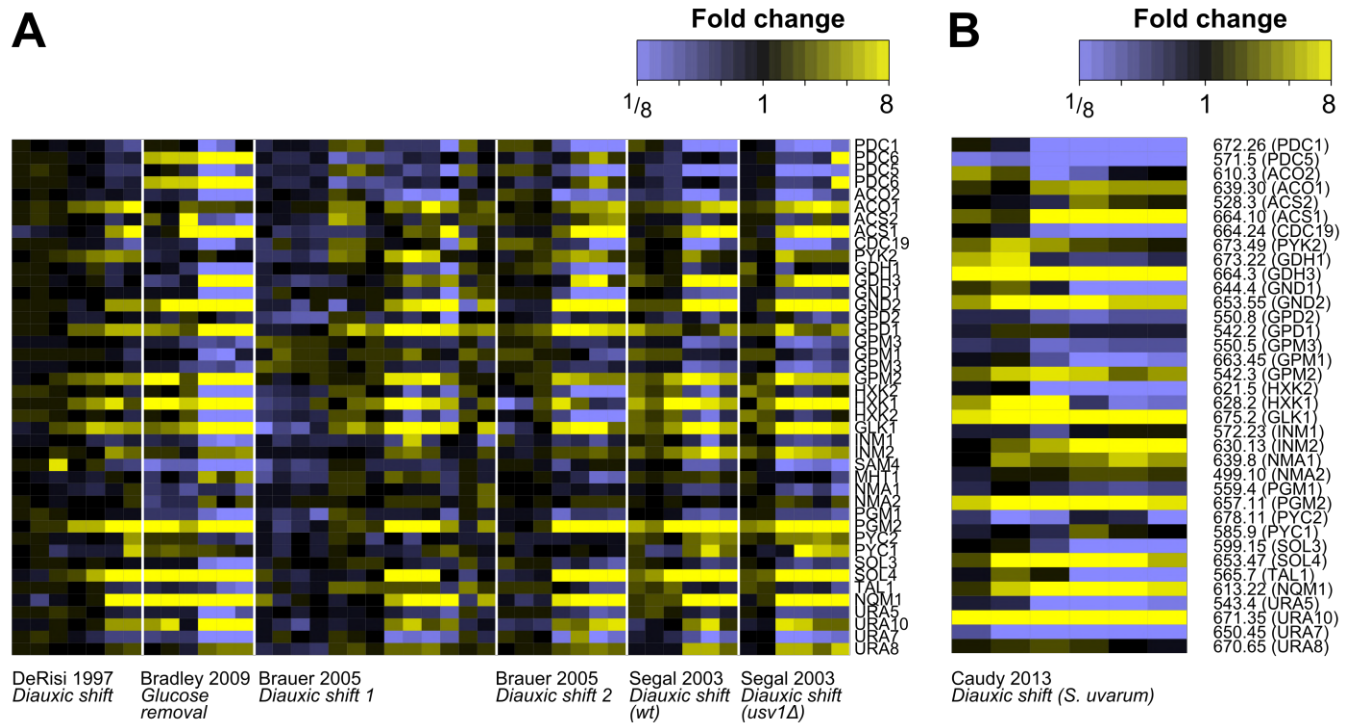

760

761 Figure 3. Anticorrelation of 16 isozyme pairs in response to glucose availability. a) Gene expression profiles of  
 762 isozymes that are associated with the transition from using glucose to using alternative carbon sources. Array  
 763 data from several diauxic shift and carbon removal experiments were collected, showing induction of one  
 764 member of the pair (yellow) and repression of the other (blue) across the diauxic shift. Intensity corresponds to  
 765 fold change. Genes are grouped into isozyme pairs. b) Gene expression signature of isozymes is conserved over  
 766 evolutionary time. Isozymes were mapped to their syntenic orthologs in *Saccharomyces uvarum*. The expression  
 767 of these orthologs in *S. uvarum* during the diauxic shift (86) shows the same overall pattern as the original  
 768 isozymes in *Saccharomyces cerevisiae* (compare panel a).

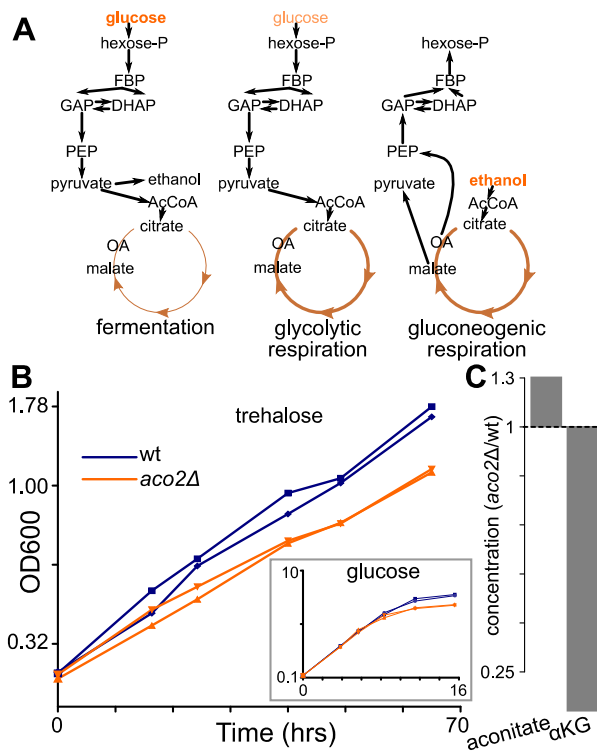

769 Figure 4. Deletion of the minor aconitase isozyme *aco2* results in a selective growth defect on trehalose,  
 770 indicating impaired glycolytic respiration. a) Schematic of metabolism across the diauxic shift. In the presence of  
 771 high levels of glucose (left), *S. cerevisiae* prefers to ferment glucose to ethanol. As glucose becomes limiting  
 772 (center), *S. cerevisiae* continues to use glucose but converts it into acetyl-CoA and eventually CO<sub>2</sub>, in so doing  
 773 driving TCA cycle turning and oxidative phosphorylation. We term this state glycolytic respiration. Finally, when  
 774 glucose is exhausted, *S. cerevisiae* uses ethanol to make acetyl-CoA, as well as sugar phosphates through  
 775 gluconeogenesis. We refer to this state as gluconeogenic respiration. b) Growth of wild-type and *aco2Δ* strains  
 776 on minimal medium with trehalose, which is digested extracellularly to provide a steady but limiting amount of  
 777 glucose, reveals a growth defect for *aco2Δ* during gluconeogenic respiration. In contrast, when grown on  
 778 glucose (inset), the *aco2* deletion mutant has no growth defect in log-phase and only begins to show a growth  
 779 defect when glucose becomes limiting. Data are biological duplicates. c) During steady-state growth on limiting  
 780 glucose, aconitate is slightly elevated (137% of wild-type) and  $\alpha$ -ketoglutarate decreased (56% of wild-type) in  
 781 the *aco2Δ* mutant compared to wild-type. Bar plots represent averages of four technical replicates (repeated  
 782 sampling from one chemostat per strain).

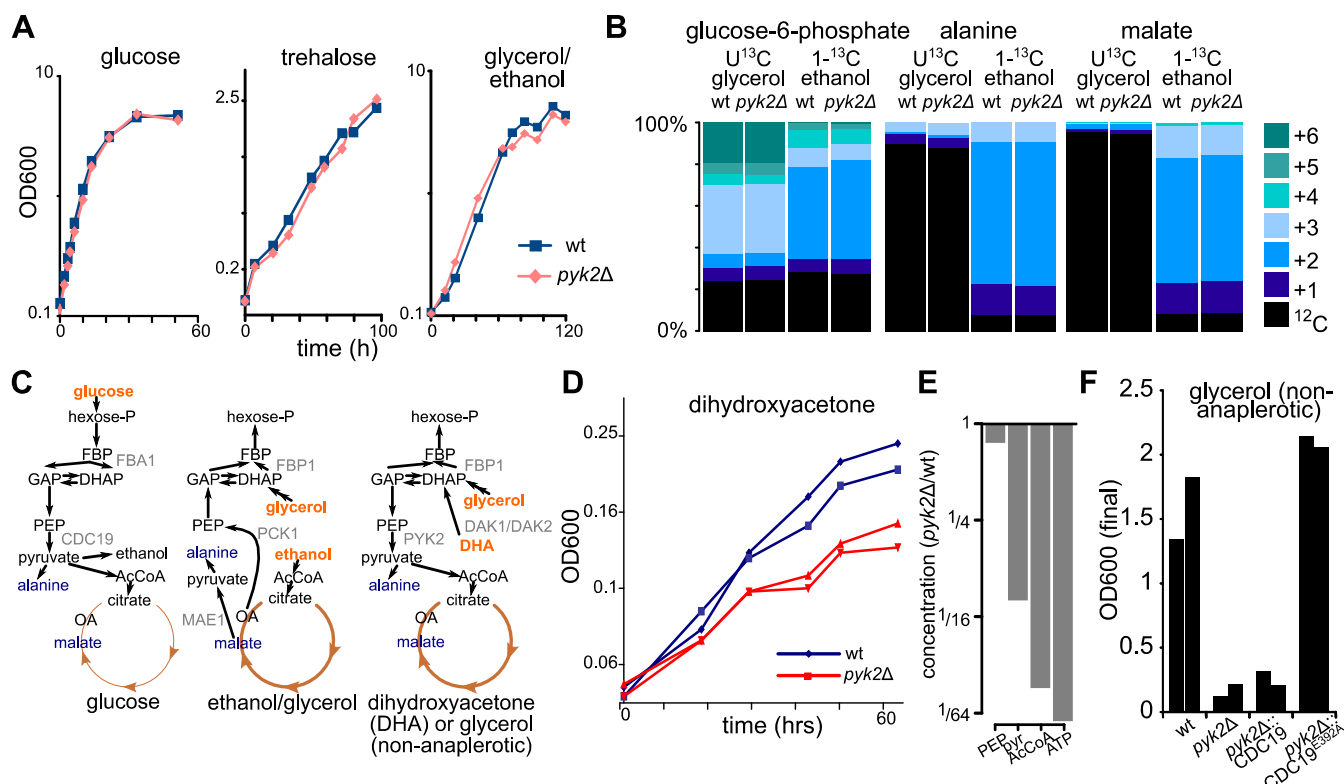

783 Figure 5. Deletion of the minor pyruvate kinase isozyme *PYK2* results in a selective growth defect on  
 784 dihydroxyacetone, a three carbon sugar. a) Growth of wild-type and *pyk2Δ* strains on glucose, trehalose, and  
 785 glycerol/ethanol minimal media, revealing no defect for *PYK2* deletion. b) <sup>13</sup>C-labeling shows that, for wild-type  
 786 yeast growing on glycerol/ethanol minimal medium, glucose-6-phosphate labels from both glycerol and ethanol,  
 787 but alanine (a proxy for pyruvate) and malate are labeled exclusively from ethanol. Thus, glycerol is not used to  
 788 make pyruvate. The *PYK2* deletion does not affect these labeling patterns. Labeling patterns are averages of  
 789 biological duplicates. c) Schematic of glycolysis and TCA cycle comparing the metabolism of glucose,  
 790 glycerol/ethanol medium, and dihydroxyacetone. d) Growth of wild-type and *pyk2Δ* strains on dihydroxyacetone  
 791 minimal medium reveals a growth defect for *pyk2Δ*. Data are biological duplicates. e) At steady state on limiting  
 792 dihydroxyacetone, phosphoenolpyruvate changes only slightly in concentration (85% of wild-type), while  
 793 pyruvate (down 3.4-fold), acetyl-CoA (down 12-fold), and ATP (down 16-fold) are substantially decreased. Bar  
 794 plots represent averages of four technical replicates (repeated sampling from one chemostat per strain). f)  
 795 Growth on synthetic glycerol (glycerol/CSM-Arg-Asp) medium is normal in wild-type and when *pyk2Δ* is rescued  
 796 with the FBP-insensitive mutant *CDC19E392A*, but near-abolished for *pyk2Δ* and *pyk2Δ* rescued with wild-type  
 797 *CDC19*. Bars are final OD600 of biological duplicates.

798

# 1 Minor isozymes tailor yeast metabolism to carbon 2 availability

3 Patrick H. Bradley, Patrick A. Gibney, David Botstein, Olga G. Troyanskaya, Joshua D. Rabinowitz.

---

## 4 Note S1

### 5 Key differences from previous analyses of expression data

6 Previously used statistics for assessing differential isozyme regulation include compendium-wide  
7 correlation (1) and PCoR (partial co-regulation, or the standard deviation of per-experiment correlation  
8 statistics) (2). One potential shortcoming of both compendium-wide correlation and PCoR is that they  
9 can be biased by the composition of the compendium itself, which, despite its diversity, is itself a  
10 highly biased sampling of experimental conditions and transcriptional states (3). If a given isozyme pair  
11 were strongly anticorrelated in only a small fraction of conditions assayed in the compendium, both  
12 PCoR and especially the overall correlation would tend to be dominated by the remaining conditions,  
13 lowering power.

14 Second, calculating a single overall correlation as in Ihmels et al. (1) also requires gene expression data  
15 to be concatenated into a single matrix. This requires normalization to minimize the contribution of  
16 technical variation between experiments; however, with hundreds of experiments spanning both  
17 single- and dual-channel microarrays, it is unclear how such normalization would be performed.  
18 Correlation across an entire compendium has also been shown to compare unfavorably to weighted  
19 per-dataset correlations in the context of function prediction (4).

20 Third, neither PCoR nor the overall correlation provide any condition-specific information, whereas the  
21 main purpose of the method we use is to associate the differential expression of isozymes with specific  
22 environmental perturbations. Finally, previous methods have not used thresholds derived from  
23 statistical hypothesis testing with false-discovery rate correction, which becomes particularly  
24 important in a compendium with hundreds of experiments (5), and all of these previous approaches  
25 used both positive and negative correlation, making them potentially sensitive to cross-hybridization  
26 (6, 7).

27 In our analysis, we took a different approach in which, within each experiment in our compendium, we  
28 identified statistically significant negative correlations between isozymes, and then looked for trends  
29 within and across clusters of related experiments.

## 30 Note S2: Supplemental Methods

### 31 Assembly of microarray compendium and calculation of normalized correlations

32 The datasets constituting the microarray compendium were drawn from two sources. First, we  
33 included 129 datasets previously collected by Hibbs et al. (4). Second, the Gene Expression Omnibus  
34 (8) was queried for series uploaded between January 1, 2005 and April 1, 2009 that included array  
35 data from *Saccharomyces cerevisiae* and contained at least 6 samples, returning 417 datasets. These



36 417 were then processed according to the following schema: (i) tabular files were extracted from the  
37 SOFT files; (ii) larger datasets were broken into logical datasets as per Hibbs et al. (4); (iii) redundant  
38 datasets (e.g., supersets of other logical datasets, or duplicates of the data collected by Hibbs et al.)  
39 were excluded; (iv) missing values were imputed via the KNNimpute tool in the Sleipnir library (9, 10)  
40 with default parameters; and (v) multiple probes for the same gene were collapsed into per-gene  
41 expression profiles using a maximum likelihood method (4). In total, 285 non-redundant expression  
42 datasets were added to the compendium from GEO.

43 Normalized correlations were calculated by taking pairwise Pearson correlations between all pairs of  
44 genes  $x$  and  $y$  in every dataset  $d$  as follows:

$$45 \quad r_{x,y,d} = \sum_{i=1}^{||x||} \frac{(x_i - \bar{x})(y_i - \bar{y})}{(||x|| - 1)\sigma_x\sigma_y}$$

46 Here,  $x$  and  $y$  are the gene expression vectors in dataset  $d$ ,  $||x||$  is the length of  $x$ ,  $x_i$  and  $y_i$  are the  
47 values of each vector at index (i.e., array)  $i$ , and  $\sigma_x$  and  $\sigma_y$  are the standard deviations of  $x$  and  $y$ . Pearson  
48 correlations were then transformed according to the Fisher's z-transform (i.e., hyperbolic arctangent).

49 These scores were converted to standardized z-scores by dividing by the standard error  $\left(\sqrt{||x|| - 3}\right)^{-1}$ .

50 The z-scores were then used as the test statistic for a Wald test, yielding  $p$ -values. Finally, the  $p$ -values  
51 were corrected for multiple testing by conversion to  $q$ -values (5, 11).

## 52 [Logistic regression classification](#)

53 We classified isozyme pairs into two groups based on whether they appeared, based on analysis of  
54 expression in our expression compendium, more like members of the same protein complex or more  
55 like random pairs. To do this, we took the binary differential expression vectors (see above) for pairs in  
56 the same protein complex and for random pairs, and fit a generalized linear model (using the "glm"  
57 function in R (12))) to classify pairs as one or the other:

$$58 \quad \log\left(\frac{c}{1-c}\right) = \beta_0 + \beta_1 p_m + \epsilon$$

59 Here,  $c$  is the probability of a gene pair belonging to the same complex (vs. random pairs),  $\beta_0$  and  $\beta_1$  are  
60 parameters learned by the model,  $p_m$  is as above, and  $\epsilon$  represents residual error. A value of  $c$  above 0.5  
61 indicated that the pair was, at least weakly, more likely to be a "same complex" pair, and a value of  $c$   
62 above 5/6 or below 1/6 was taken as a confident classification of a pair into the "same complex" or  
63 "random" categories. A graphical illustration is presented in Supplemental Figure 1.

64

## 65 [PAM clustering](#)

66 Partitioning around medoids (PAM) was performed using the cluster package in R (13) with  $k = 3$  based  
67 on a dissimilarity matrix constructed using the Jaccard distance.

## 68 [Supplemental Tables](#)

69 [Supplemental Table S1.](#)

70 Enrichments of metabolic pathways for reactions catalyzed by isozymes. Pathways were drawn from  
 71 the Yeast Pathway database (14). *p*-values are from two-tailed Fisher exact tests, Bonferroni-Holm  
 72 corrected for multiple testing. Pathway sets that were significantly enriched for isozymes at *p* < 0.05  
 73 are shown in bold.

| Pathway                                          | Isozymes | Other     | <i>p</i> -value             |
|--------------------------------------------------|----------|-----------|-----------------------------|
| Amino Acid Biosynthesis                          | 5        | 90        | 1                           |
| <b>Glycolysis, Gluconeogenesis, Fermentation</b> | <b>9</b> | <b>12</b> | <b>5.44x10<sup>-8</sup></b> |
| Lipid and Sterol Biosynthesis                    | 1        | 29        | 1                           |
| NAD <sup>+</sup> Biosynthesis                    | 2        | 16        | 1                           |
| Nucleotide Biosynthesis                          | 5        | 42        | 1                           |
| <b>Pentose Phosphate Pathway</b>                 | <b>3</b> | <b>5</b>  | <b>0.0245</b>               |
| SAM Cycle                                        | 1        | 2         | 0.86                        |
| Storage Carbohydrates                            | 2        | 10        | 0.86                        |
| <b>TCA and Glyoxylate Cycle</b>                  | <b>4</b> | <b>8</b>  | <b>0.0122</b>               |
| Other                                            | 7        | 271       |                             |
| Total                                            | 39       | 485       |                             |

74

75 [Supplemental Table S2.](#)

76 Ten datasets with the greatest number of anticorrelated isozyme pairs. Source of the dataset (NP = not  
 77 published), brief description, and a list of the anticorrelated isozymes are provided. The majority of  
 78 these datasets have clear connections to glucose signaling (Ras, PKA) and availability. (Note that the  
 79 *sua5Δ* deletion lacks cytochrome *c* and cannot grow on respiratory media.)

| Dataset    | Brief description                           | Anticorrelated isozymes                                                                                                                                                                                                                                                      |
|------------|---------------------------------------------|------------------------------------------------------------------------------------------------------------------------------------------------------------------------------------------------------------------------------------------------------------------------------|
| Meng (NP)  | <i>sua5Δ</i> deletion vs. wildtype          | MET12/MET13, HXK1/HXK2, HXK2/GLK1, SAM2/SAM1, PDC6/PDC5, PDC6/PDC1, DLD1/DLD2, TDH1/TDH3, URA5/URA10, UTR1/YEF1, ACS1/ACS2, CDC19/PYK2, DAK2/DAK1, ENO1/ERR3, ENO2/ERR3, GND2/GND1, GPM1/GPM2, GPM2/GPM3, GPP2/GPP1, IMD2/IMD4, PFK26/PFK27, PGM1/PGM2, SOL3/SOL4, TAL1/NQM1 |
| Smith 2008 | Growth of segregants on ethanol and glucose | HXK1/HXK2, HXK2/GLK1, PDC6/PDC5, PDC6/PDC1, PYC1/PYC2, NMA2/NMA1, ACO1/ACO2, YIA6/YEA6, DAL7/MLS1, ENO1/ERR3, ENO2/ERR3, GND2/GND1, GPD1/GPD2, GPM1/GPM2, GPM2/GPM3,                                                                                                         |

|              |                                                                        |                                                                                                                                                                                                                        |
|--------------|------------------------------------------------------------------------|------------------------------------------------------------------------------------------------------------------------------------------------------------------------------------------------------------------------|
|              |                                                                        | INM1/INM2, MHT1/SAM4, PFK26/PFK27, PGM1/PGM2, SOL3/SOL4, TAL1/NQM1, URA7/URA8                                                                                                                                          |
| Rossouw 2008 | Profiling of wine strains during fermentation                          | HXK1/HXK2, HXK2/GLK1, PDC6/PDC1, PDC5/PDC1, LYS21/LYS20, URA5/URA10, ACO1/ACO2, ACS1/ACS2, CDC19/PYK2, DAL7/MLS1, ENO1/ENO2, ENO2/ERR3, GDH3/GDH1, GND2/GND1, GPM1/GPM3, GPM2/GPM3, PGM1/PGM2, SOL3/SOL4, TAL1/NQM1    |
| Zhu 2009     | Heat shock                                                             | HXK1/HXK2, HXK2/GLK1, PDC6/PDC5, PDC6/PDC1, PYC1/PYC2, URA5/URA10, NMA2/NMA1, ACO1/ACO2, ACC1/HFA1, ACS1/ACS2, ASN1/ASN2, GDH3/GDH1, GPD1/GPD2, GPM1/GPM3, GPM2/GPM3, GPP2/GPP1, PFK26/PFK27, PGM1/PGM2, URA7/URA8     |
| Urban 2007   | Sch9/TORC1 signaling                                                   | NTH2/NTH1, PDC6/PDC5, PDC6/PDC1, PYC1/PYC2, ADE16/ADE17, UTR1/YEF1, ACC1/HFA1, ACS1/ACS2, DAK2/DAK1, DAL7/MLS1, ENO1/ERR3, ENO2/ERR3, GDH3/GDH1, GND2/GND1, HMG2/HMG1, PFK26/PFK27, SOL3/SOL4, TAL1/NQM1, URA7/URA8    |
| Guldal (NP)  | Ras/PKA response (glucose regulation)                                  | MET12/MET13, HXK1/HXK2, HXK2/GLK1, PYC1/PYC2, URA5/URA10, THI20/THI21, NMA2/NMA1, ACO1/ACO2, YIA6/YEA6, ACS1/ACS2, GDH3/GDH1, GPD1/GPD2, GPM1/GPM3, GPM2/GPM3, INM1/INM2, MHT1/SAM4, PFK26/PFK27, SOL3/SOL4, URA7/URA8 |
| Sill (NP)    | Histone acetyltransferase study (ESA1)                                 | PDC6/PDC5, URA5/URA10, NMA2/NMA1, CDC19/PYK2, DAK2/DAK1, ENO1/ERR3, ENO2/ERR3, GDH3/GDH1, GND2/GND1, GPM1/GPM2, GPM2/GPM3, IMD2/IMD3, IMD2/IMD4, INM1/INM2, MHT1/SAM4, PFK26/PFK27, PGM1/PGM2, SOL3/SOL4, TAL1/NQM1    |
| Singh 2005   | Dessication and rehydration on limiting glucose (lab strain, series 2) | MET12/MET13, SAM2/SAM1, PDC6/PDC5, PDC5/PDC1, PYC1/PYC2, URA5/URA10, NMA2/NMA1, ACS1/ACS2, CDC19/PYK2, GDH3/GDH1, GND2/GND1, GPM1/GPM2, HMG2/HMG1, INM1/INM2, PFK26/PFK27, TAL1/NQM1, THI21/THI22, URA7/URA8           |
| Sha 2013     | Oxidative stress                                                       | MET12/MET13, PDC6/PDC5, PDC6/PDC1, URA5/URA10, UTR1/YEF1, NMA2/NMA1, YIA6/YEA6, ACS1/ACS2, ASN1/ASN2, ENO1/ERR3, ENO2/ERR3, GND2/GND1, GPD1/GPD2, GPP2/GPP1, INM1/INM2, MHT1/SAM4, TAL1/NQM1, URA7/URA8                |

|              |                                                      |                                                                                                                                                                                              |
|--------------|------------------------------------------------------|----------------------------------------------------------------------------------------------------------------------------------------------------------------------------------------------|
| Capaldi 2008 | <i>HOG1</i> mutants in either KCl or glucose upshift | HXK1/HXK2, HXK2/GLK1, PDC6/PDC5, PYC1/PYC2, URA5/URA10, ACO1/ACO2, ACS1/ACS2, GDH3/GDH1, GND2/GND1, GPD1/GPD2, GPM1/GPM3, HMG2/HMG1, INM1/INM2, PFK26/PFK27, PGM1/PGM2, SOL3/SOL4, URA7/URA8 |
|--------------|------------------------------------------------------|----------------------------------------------------------------------------------------------------------------------------------------------------------------------------------------------|

80

81

82

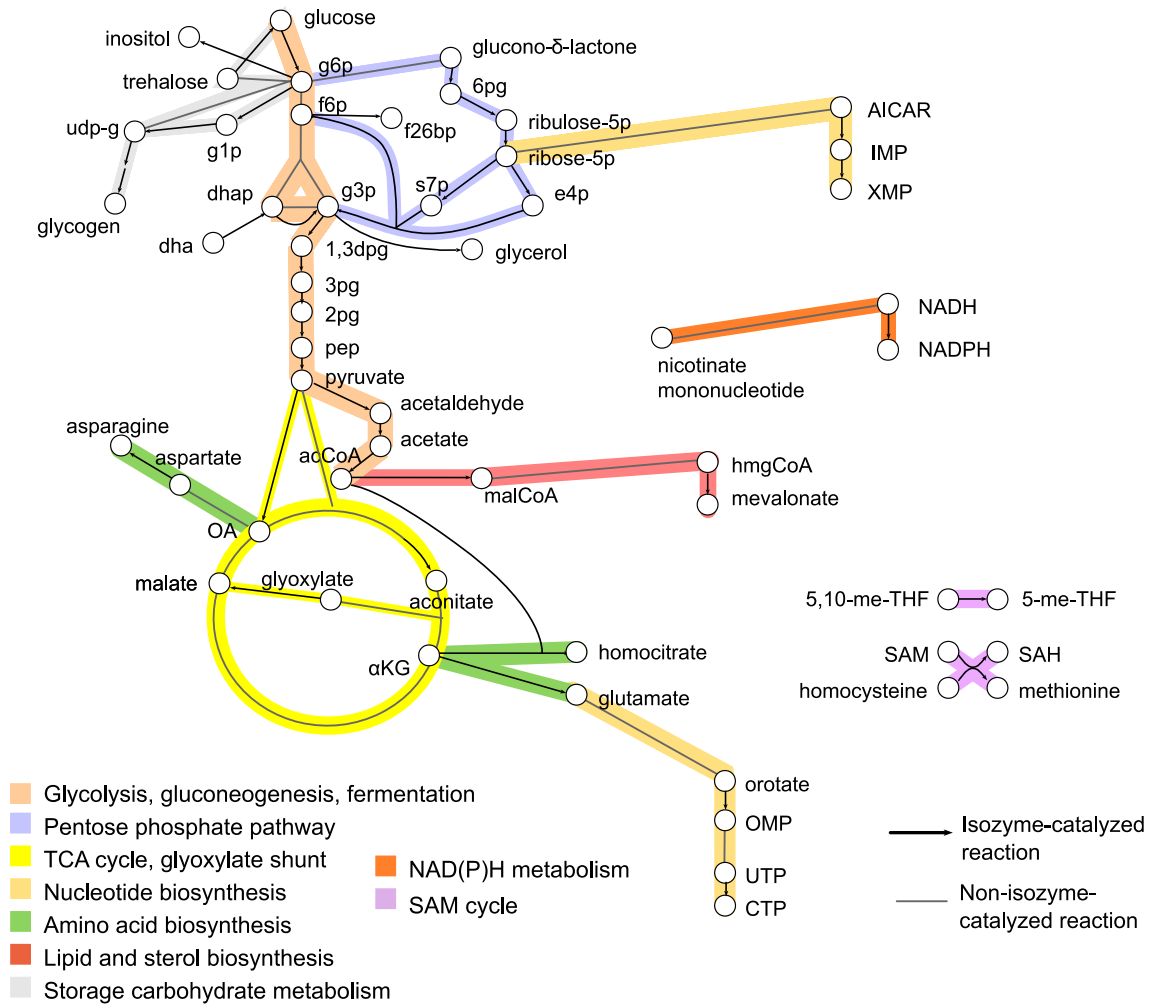

83

84 **Supplemental Figure S1**

85 Co-localized metabolic isozymes in *Saccharomyces cerevisiae* are enriched in central carbon metabolism.  
 86 Reactions catalyzed by metabolic isozymes of the same compartment are shown in black arrows;  
 87 metabolites that are substrates or products of these isozyme-catalyzed reactions are shown as white  
 88 circles. Other reactions are shown with a gray dotted line. Reactions are highlighted according to  
 89 pathway (inset). While a large proportion of reactions catalyzed by these isozymes are in central carbon  
 90 metabolism (glycolysis and gluconeogenesis, the TCA cycle, and the pentose phosphate pathway),  
 91 comparatively few are in, for example, amino acid biosynthesis (green). Enrichment *p*-values are given in  
 92 Supplemental Table S1.

93

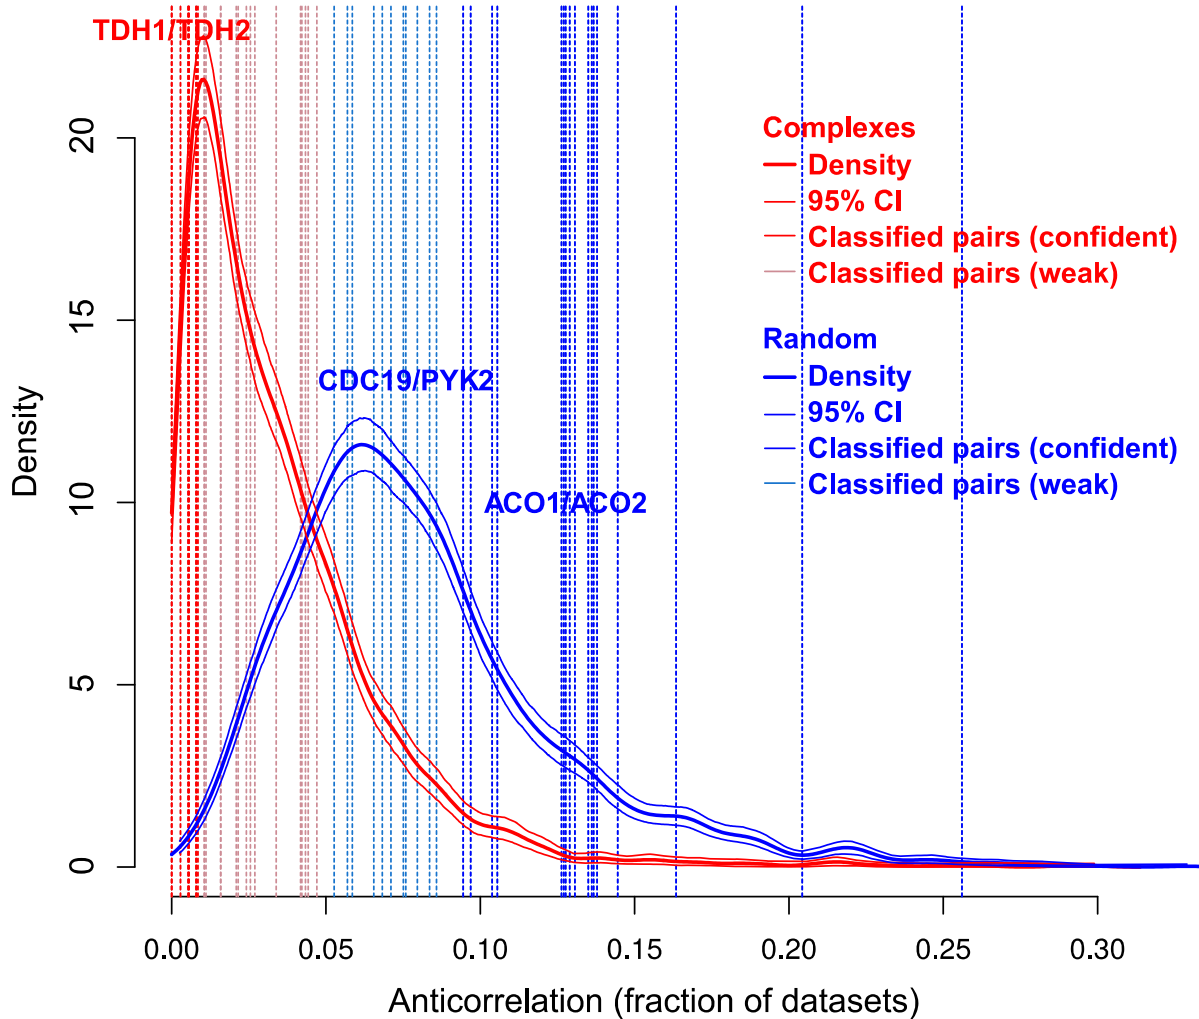

94

95 Supplemental Figure S2

96 Illustration of logistic-regression-based classification of isozyme pairs. This classification relies on the  
97 average anticorrelation as defined in Methods under “Comparison of isozymes with other types of  
98 proteins.” The estimated distributions of average anticorrelation are plotted for pairs in the same  
99 protein complex (red) and random pairs (blue), with 95% confidence intervals plotted in light red and  
100 light blue. Blue and red dashed vertical lines represent individual isozyme pairs. Light red isozymes were  
101 classified as being more like “complex” pairs ( $P(C) > 0.5$ ), with dark red isozymes classified particularly  
102 strongly as “complex” pairs ( $P(C) > 0.83$ ). Light blue and dark blue isozymes were the same for “random”  
103 pairs ( $P(C) < 0.5$  or  $P(C) < 0.17$ ). Selected isozyme pairs are labeled in red or blue.

104



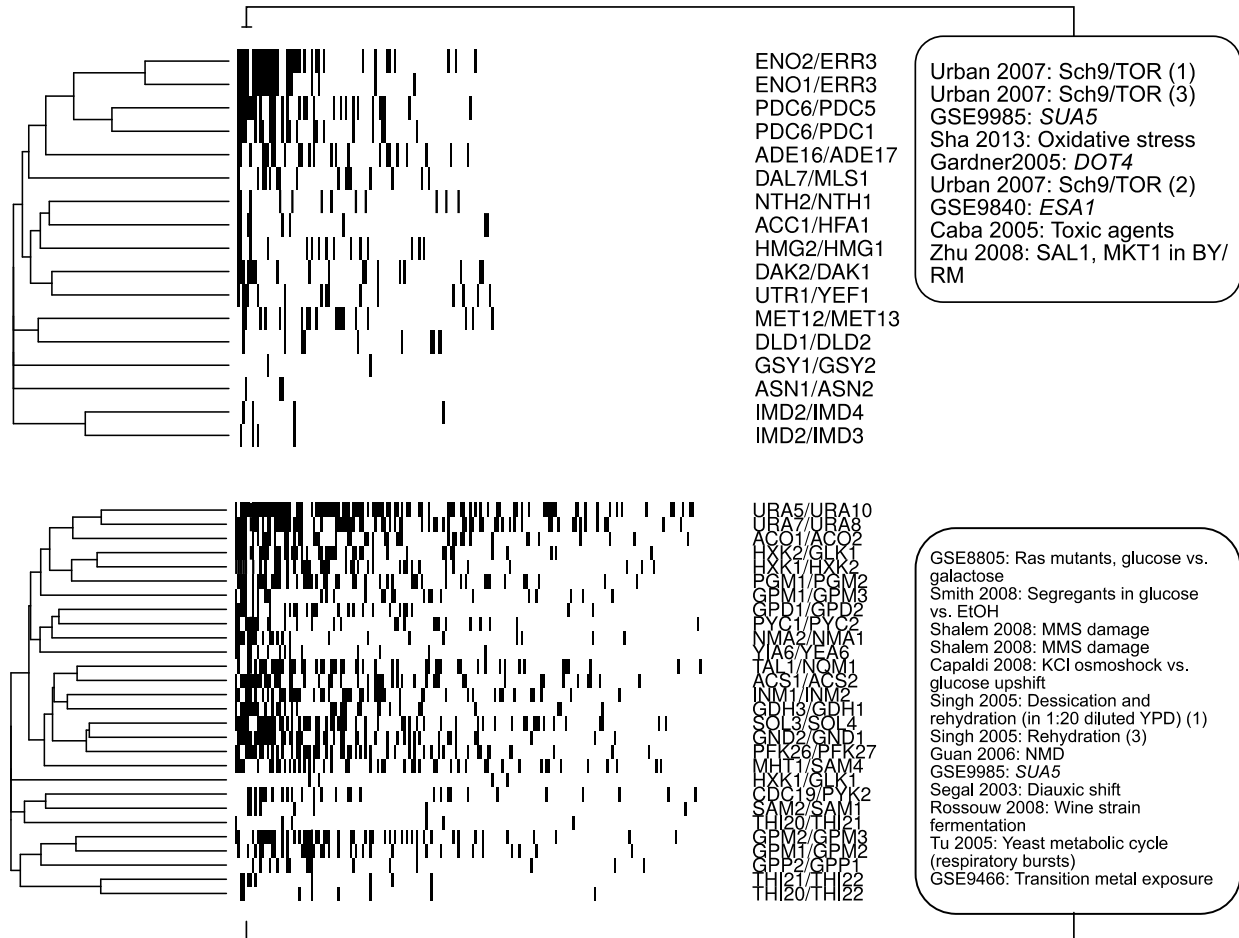

105

106 **Supplemental Figure S3**

107 Partitioning around medoids (PAM) clustering of the binary differential expression matrix described in  
 108 Methods (4.2) with three clusters revealed two coherent clusters, shown here. Black cells indicate that a  
 109 given gene pair (row) was significantly anticorrelated ( $q < 0.1$ ) in a particular dataset (column). Within  
 110 each cluster, columns are sorted from most to least anticorrelation of isozyme pairs. The columns with  
 111 the most anticorrelation of isozyme pairs for each cluster are highlighted on the right hand side of the  
 112 figure. These datasets support a role for these isozyme pairs in the response to availability of glucose vs.  
 113 other carbon sources.

114

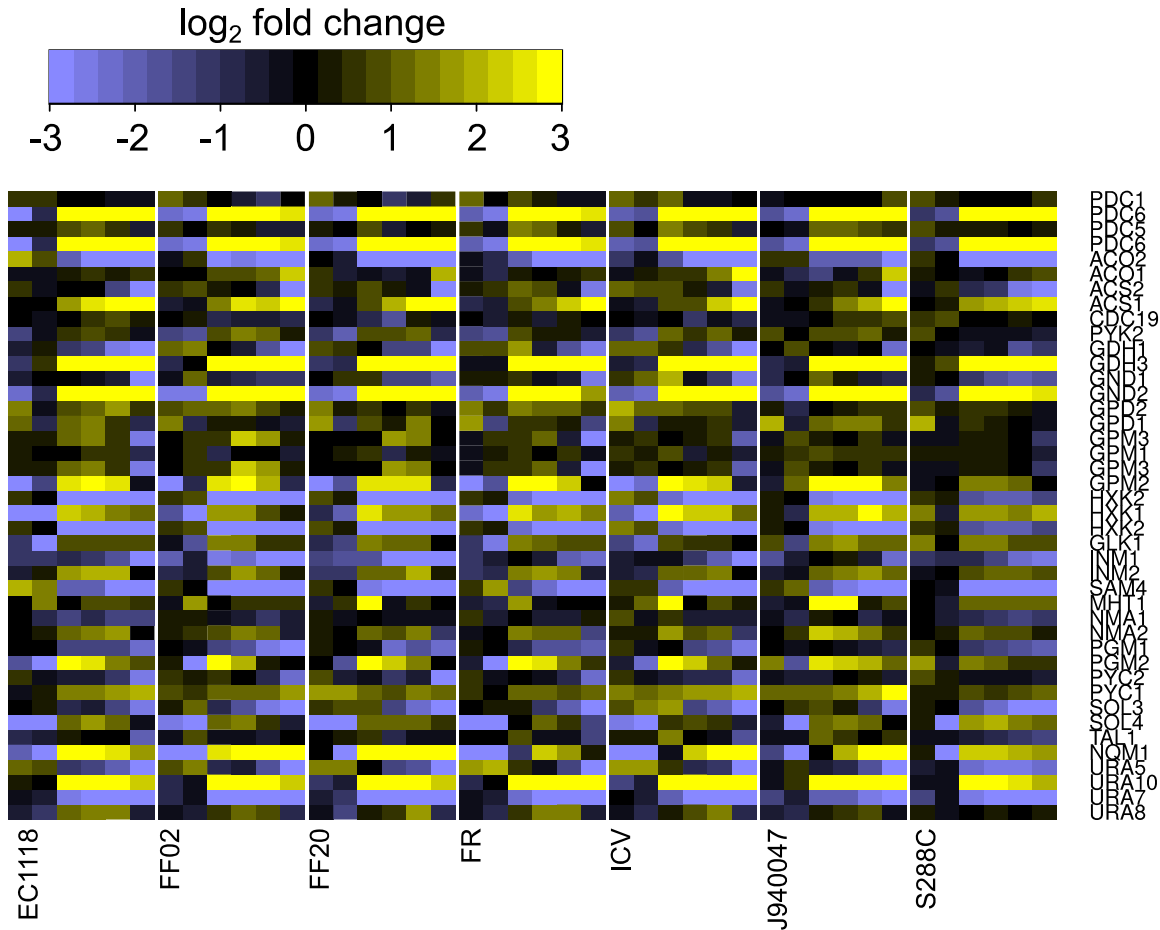

## Carreto 2011

### Diauxic shift timecourses of 7 yeast strains

115

116 [Supplemental Figure S4](#)

117 Anticorrelated expression of isozymes is conserved across diverged strains of *Saccharomyces cerevisiae*.

118 Expression profiles are from a series of diauxic shift experiments conducted in wine, lab, and natural

119 isolate strains of *S. cerevisiae* (15). As in Figure 4, these experiments show induction of one member of

120 the pair (yellow) and repression of the other (blue) across the diauxic shift. Intensity corresponds to fold

121 change; genes are grouped into isozyme pairs.

122

123

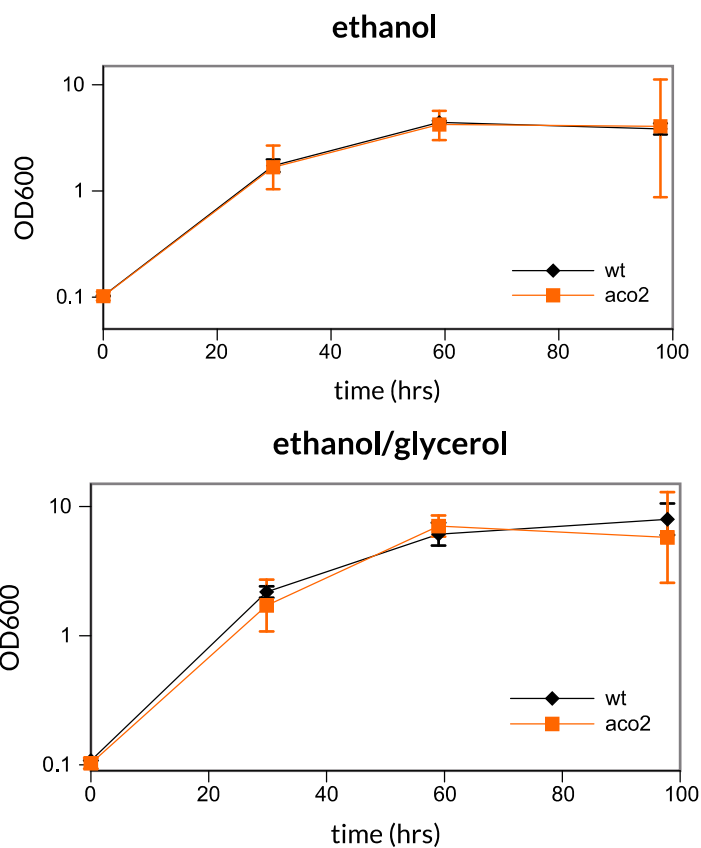

124

125 [Supplemental Figure S5](#)

126 The aconitase 2 deletion *aco2* $\Delta$  has no growth defect on minimal media with a) ethanol or b) ethanol  
127 and glycerol as the carbon source. Compare growth on trehalose and glucose (Figure 4b). Error bars are  
128 95% confidence intervals ( $n = 2$  for wildtype;  $n = 4$  for *aco2* $\Delta$ ).

129

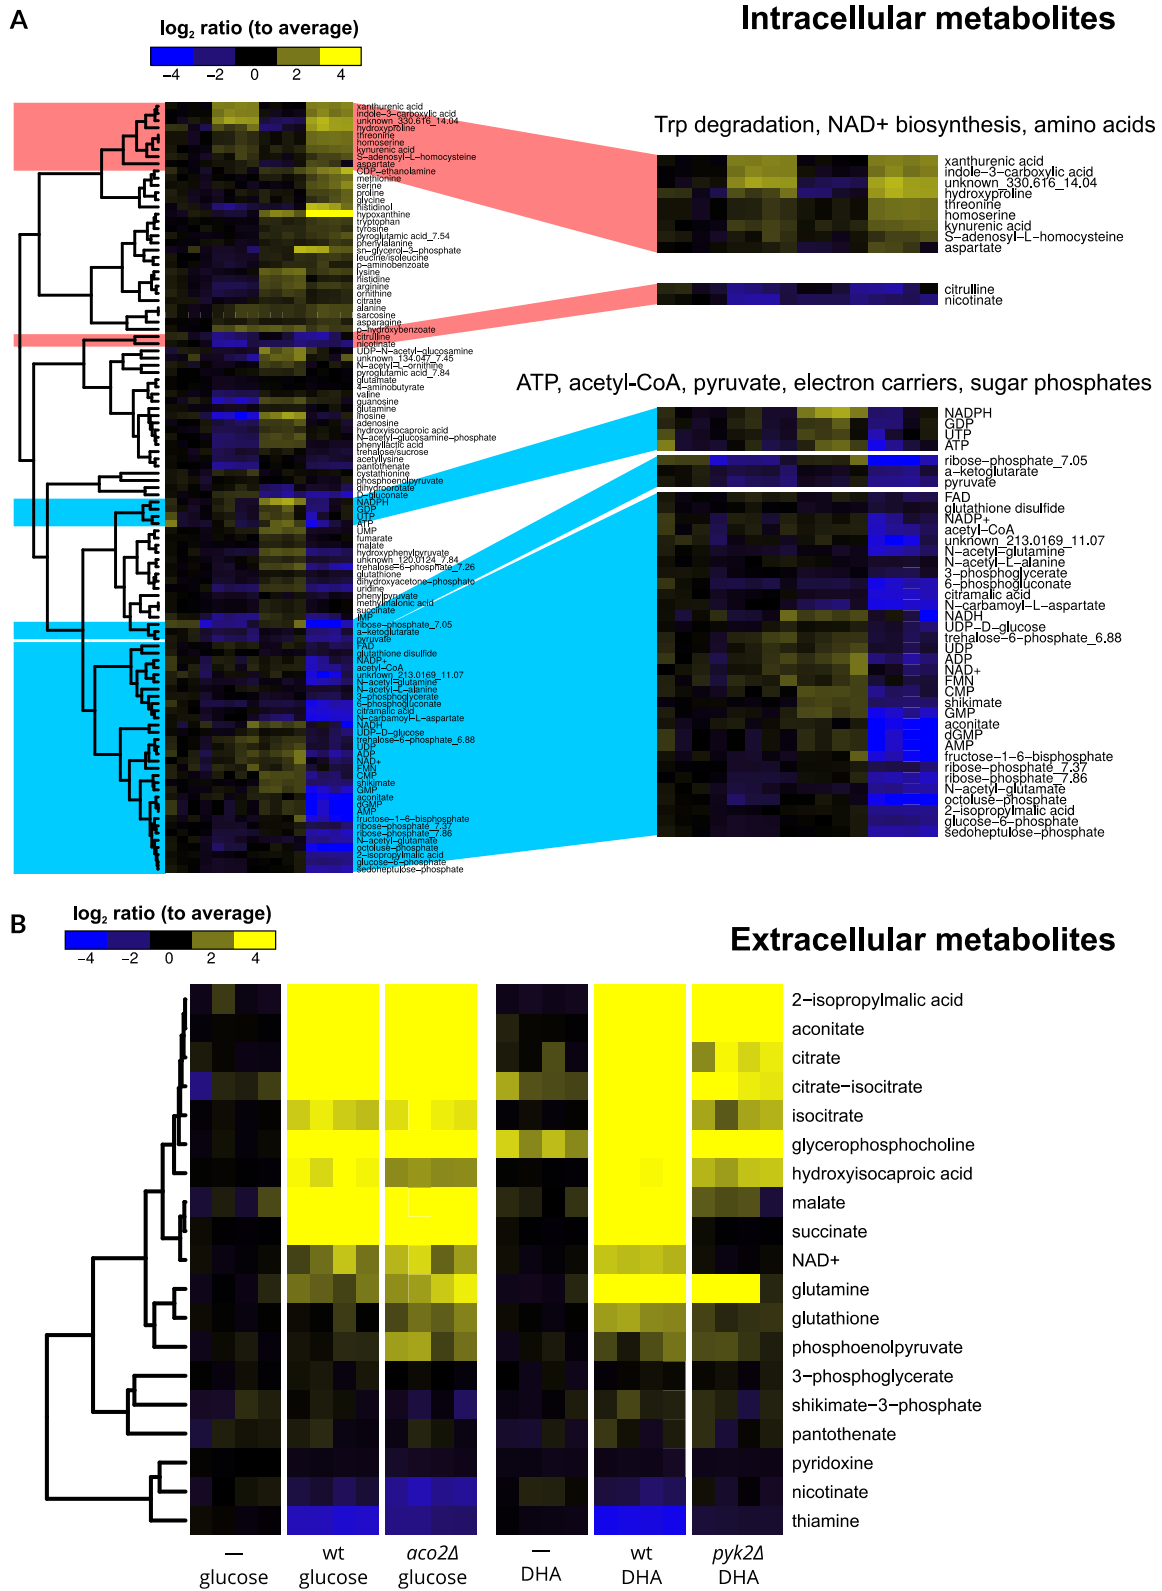

131 Supplemental Figure S6

132 Intracellular and extracellular metabolic phenotypes of *aco2Δ* and *pyk2Δ* knockouts. Columns are  
133 repeated samples from single chemostats. Ion counts for intra- and extracellular metabolites are  
134 provided in Supplemental Datasets S1 and S2, respectively. a) Intracellular metabolomic profiles of  
135 glucose- or DHA-grown chemostat cultures of wildtype (wt), *aco2Δ*, and *pyk2Δ* strains. *pyk2Δ* strains  
136 show a decrease in glycolytic intermediates and phosphorylated compounds in general, but especially  
137 pyruvate and acetyl-CoA. A drop in ATP is also observed relative to wildtype (upper blue highlight).  
138 *aco2Δ* mutants show increases in tryptophan breakdown products (upper red highlight), and a drop in  
139 nicotinate (lower red highlight), indicating a shift from import of nicotinate to *de novo* biosynthesis of  
140 NAD<sup>+</sup>. b) Extracellular compounds from the same chemostat cultures. First and fourth groups of columns  
141 indicate pre-run chemostat media. Wild-type cultures show substantial excretion of TCA cycle  
142 intermediates, glutamine, and adenosine, and show strong uptake of the vitamins nicotinate and  
143 thiamine. Compared to wildtype, *aco2Δ* shows less uptake of extracellular nicotinate (a precursor to  
144 NAD<sup>+</sup>) and greater utilization of thiamine (used chiefly to make acetyl-CoA from pyruvate), while *pyk2Δ*  
145 shows very little uptake of either. *pyk2Δ* also shows sharply reduced excretion of TCA cycle  
146 intermediates, and excretes adenine in place of adenosine, possibly indicating limitation for five-carbon  
147 sugars.

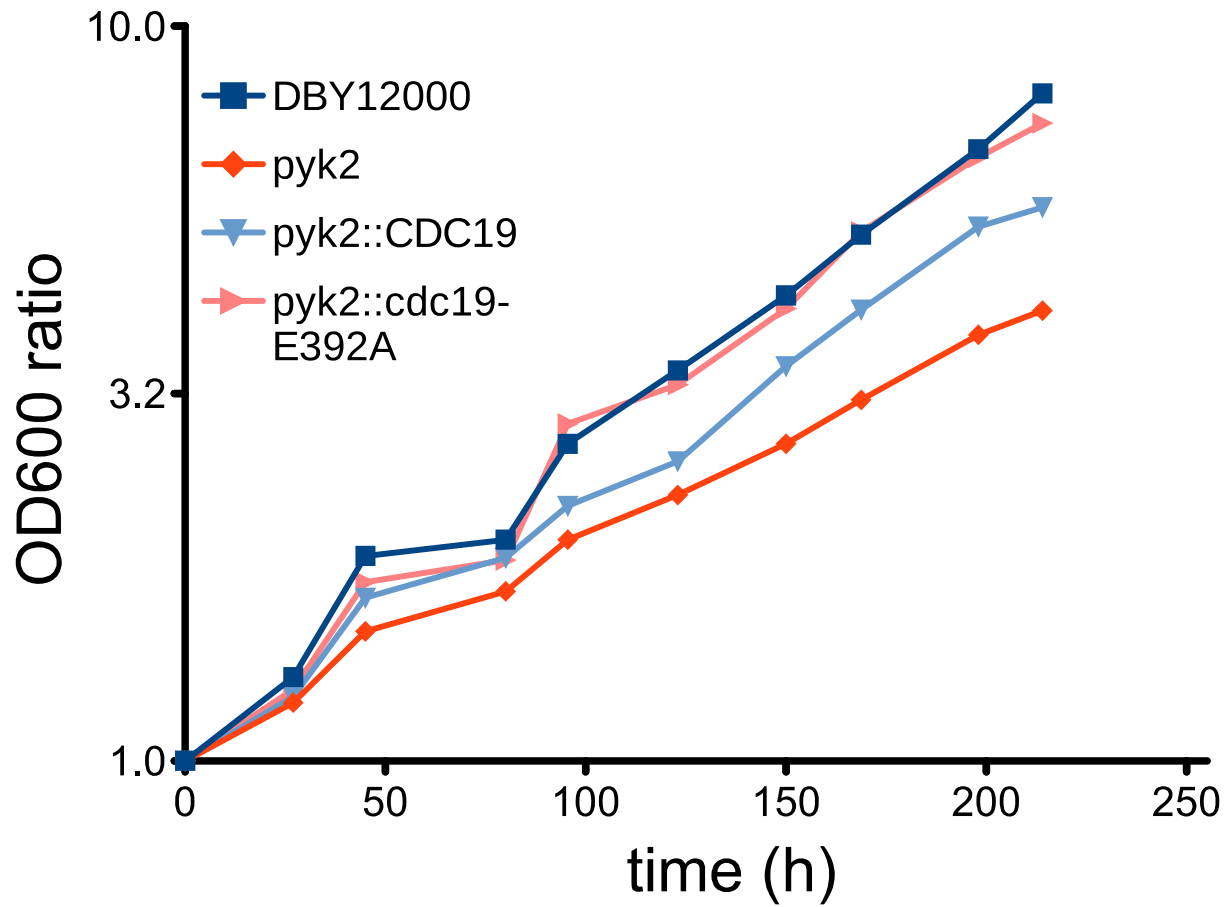

148

149 Supplemental Figure S7

150 Growth of wt, *pyk2* $\Delta$ , *pyk2* $\Delta$ ::*CDC19* and *pyk2* $\Delta$ ::*CDC19E392A* rescue strains on dihydroxyacetone (n = 1)  
151 reveals rescue by *CDC19E392A*, a mutant of *CDC19* that is FBP-insensitive, but only incompletely by wild-  
152 type *CDC19*. Growth (y-axis) is expressed as a ratio of the OD600 at a given timepoint to the OD600 at  
153 time 0.
